# Similar ratios of introns to intergenic sequence across animal genomes

Warren R. Francis<sup>1</sup> Gert Wörheide<sup>1,2,3</sup>

(1) Department of Earth and Environmental Sciences, Paleontology and Geobiology, Ludwig-Maximilians-Universität München, Richard-Wagner Straße 10, 80333 Munich, Germany

(2) GeoBio-Center, Ludwig-Maximilians-Universität München, Munich, Germany

(3) Bavarian State Collection for Paleontology and Geology, Munich, Germany

Keywords: metazoa, comparative genomics, junk DNA, complexity, C-value

## Abstract

One central goal of genome biology is to understand how the usage of the genome differs between organisms. Our knowledge of genome composition, needed for downstream inferences, is critically dependent on gene annotations, yet problems associated with gene annotation and assembly errors are usually ignored in comparative genomics. Here we analyze the genomes of 68 species across all animal groups and some single-cell eukaryotes for general trends in genome usage and composition, taking into account problems of gene annotation. We show that, regardless of genome size, the ratio of introns to intergenic sequence is comparable across essentially all animals, with nearly all deviations dominated by increased intergenic sequence. Genomes of model organisms have ratios much closer to 1:1, suggesting that the majority of published genomes of non-model organisms are underannotated and consequently omit substantial numbers of genes, with likely negative impact on evolutionary interpretations. Finally, our results also indicate that most animals transcribe half or more of their genomes arguing against differences in genome usage between animal groups, and also suggesting that the transcribed portion is more dependent on genome size than previously thought.

## Author's Summary

Within our anthropocentric genomic framework, many analyses try to define humans, mammals, or vertebrates relative to the so-called "lower" animals. This implicitly posits that vertebrates are complex organisms with large genomes and invertebrates are simple organisms with small genomes. This has the problem that genome size is therefore presumed to correlate with complexity and ignores any unknown complexity of vast numbers of invertebrate groups, many with large genomes. Animals vary widely in genome size, by almost three orders of magnitude, but when sequencing new animal genomes preference is given to those with smaller genomes for reasons of cost. In trying to understand how genomes are used in general, there is an added layer of complication from quality of the assembly and annotation. We have examined genome usage across a wide range of animals and have described ways to account for errors of low-quality annotations. We also show that the genomes of invertebrates and vertebrates are not so different, and that when large-genome invertebrates are considered, the fraction of the genome that is genes appears to be strongly predictable by genome size.

## 38 Introduction

39 Understanding why genomes vary greatly in size and how organisms make different use their genomes have  
40 been central questions in biology for decades [1]. For many bacteria, the majority of the genome is composed  
41 of relatively short genes, averaging around 1000bp, and coding for proteins. Indeed, the largest bacterial  
42 genome (a myxobacterium) that has been sequenced is only 14 megabases, containing an estimated 11,500  
43 genes [2]. However, in eukaryotic organisms genomes can be over a thousand-fold larger than bacterial  
44 genomes, due to an increase in the number of genes (tens of thousands compared to a few thousand in most  
45 bacteria), expansion of the genes themselves due to the addition of introns, and expansion of the sequence  
46 between genes.

47  
48 As the number of genome projects has grown, massive amounts of data have become available to study  
49 how organisms organize and use their genomes. Genome projects vary substantially in quality of assembly  
50 and annotation [3,4]. Unfortunately, the predicted genes are often taken for granted as being correct when  
51 these are only hypotheses of gene structure [5]. For example, one study found that almost half of the genes  
52 in the *Rhesus* monkey genome had a predictable annotation error when compared to the closest human  
53 homolog [6]. This has profound implications for all downstream analyses, such as studying evolution of  
54 orthologous proteins [7] and phylogeny based on protein matrices or gene content [8,9]. When considered  
55 across all genes, systematic errors in genome assembly or annotation would severely skew bulk parameters  
56 of a genome.

57  
58 While issues of assembly are often thought to be technical problems that are resolved before continuing,  
59 all subsequent analyses are dependent upon accurate genome assembly and annotation. The absence of a  
60 protein family in a particular organism is only meaningful if it is certain that it is absent from the genome  
61 and not merely the annotation, therefore it is of utmost importance that all genes are properly represented.  
62 Yet for most genome projects of non-model organisms, there are limited methods to determine if the assem-  
63 bly and annotation are sufficient for downstream comparative analyses. Internal metrics can be used, such  
64 as the fraction of raw genomic reads or ESTs that map back to the assembly, though this does not tell us if a  
65 gene is believable in the context of other animals. Alternatively, counts of “universal” single-copy orthologs  
66 have been proposed as a metric of genome completeness [10,11], though these genes only represent a small  
67 subset of all genes (few hundred out of tens of thousands in most animals).

68  
69 Identification of universal trends in genome organization and usage may enable better quantitative met-  
70 rics of genome completeness. Mechanistic models relating to evolution of gene content or coding fractions  
71 tended to focus on bacteria or archaea because of the relative ease of annotation. In regards to eukaryotes,  
72 some patterns in genome size have been discussed [12–14]. Additionally, a handful of studies have analyzed  
73 genome size in connection to other parameters such as indels [15], transposon content [16–19], average intron  
74 length [20,21] or total intron length [18]. Despite these advances, none of these studies have estimated the  
75 amount of the genome that is genic, and none of them have described a way to account for technical problems  
76 in assembly and annotation.

77  
78 Here we examine basic trends of genome size and the relationship to annotation quality across animals  
79 and some single-celled eukaryotes. We show that assembly and annotation errors are widespread and pre-  
80 dictable and that many genomes are likely to be missing many genes. We further show that re-annotation  
81 of select species with publicly available tools and transcriptome data improves the annotation. Future users  
82 may benefit if databases incorporate more recent data from transcriptome sequencing, and update annota-  
83 tion versions more frequently. Comparison of genomic composition across many animal groups indicated a  
84 ratio of introns:intergenic approaching 1:1, suggesting this as a potential parameter to identify genome com-  
85 pleteness across metazoans, and potentially other eukaryotes. Finally, this implies that animals transcribe  
86 at least half of their genomes whereby small, exon-rich genomes transcribe most of the genome and large  
87 genomes transcribe approximately half of the genome.

88

## 89 Methods

### 90 Genomic data sources

91 Data sources and parameters are available in Supplemental Table 1.

92  
93 Genomic scaffolds and annotations for *Ciona intestinalis* [22], *Branchiostoma floridae* [23], *Trichoplax ad-*  
94 *herens* [24], *Capitella teleta* [25], *Lottia gigantea* [25], *Helobdella robusta* [25], *Saccoglossus kowalevskii* [26],  
95 *Monosiga brevicollis* [27], *Emiliania huxleyi* [28], and *Volvox carteri* [29] were downloaded from the JGI  
96 genome portal.

97  
98 Genome assemblies and annotations for *Sphaeroforma arctica*, *Capsaspora owczarzaki* [30] and *Salpin-*  
99 *goeca rosetta* [31] were downloaded from the Broad Institute.

100  
101 GFF annotations v2.1 [32] for *Amphimedon queenslandica* were downloaded from the Amphimedon  
102 Genome website (<http://amphimedon.qcloud.qcif.edu.au/downloads.html>), and v1 annotations [33] and as-  
103 semblies were downloaded from Ensembl.

104  
105 For *Nematostella vectensis*, Nemve1 assembly and annotations [34] were downloaded from JGI, and the  
106 transcriptome for comparative reannotation was downloaded from <http://www.cnidariangenomes.org/> [35].

107  
108 Genome assembly, transcriptome assemblies from Cufflinks and Trinity, and GFF annotations for *Mne-*  
109 *miopsis leidyi* [8] were downloaded from the Mnemiopsis Genome Portal (<http://research.nhgri.nih.gov/mnemiopsis/>).  
110 Assembly and annotations for *Sycon ciliatum* [36] were downloaded from COMPAGEN. Assembly and  
111 annotation for *Botryllus schlosseri* [37] were downloaded from the Botryllus Schloseri genome project  
112 (<http://botryllus.stanford.edu/botryllusgenome/>). Assembly and annotation for *Exaiptasia pallida* (for-  
113 merly *Aiptasia sp.*) [38] were downloaded from <http://reefgenomics.org>. Assembly and annotation for *Oiko-*  
114 *pleura dioica* [39] were downloaded from Genoscope (<http://www.genoscope.cns.fr/externe/GenomeBrowser/Oikopleura/>).  
115 Assembly and annotation for *Tetrahymena thermophila* were downloaded from the Tetrahymena Genome  
116 Database ([ciliate.org](http://ciliate.org)). Assembly and annotation for *Symbiodinium kawagutii* [40] were downloaded from  
117 the Dinoflagellate Resources page ([web.malab.cn/symka\\_new/index.jsp](http://web.malab.cn/symka_new/index.jsp)).

118  
119 Assemblies and annotations for *Symbiodinium minutum* [41], *Pinctada fucata* [42], *Acropora digitifera*  
120 [43], *Lingula anatina* [44], *Ptychodera flava* [26], and *Octopus bimaculoides* [45] were downloaded from the  
121 OIST Marine Genomics Browser (<http://marinegenomics.oist.jp/gallery/>).

122  
123 Builds of *Homo sapiens*, *Pan troglodytes*, *Mus musculus*, *Canis lupus* [46], *Monodelphis domestica* [47],  
124 *Ornithorhynchus anatinus* [48], *Xenopus tropicalis* [49], *Struthio camelus* [50], *Gallus gallus*, *Taeniopygia*  
125 *guttata* [51], *Aptenodytes forsteri* [50], *Anas platyrhynchos* [52], *Melopsittacus undulatus* [53], *Alligator mis-*  
126 *sissippiensis* [54], *Anolis carolinensis* [55], *Chrysemys picta bellii* [56], *Chelonia mydas* [57], *Pelodiscus*  
127 *sinensis* [57], *Python bivittatus* [58], *Salmo salar*, *Danio rerio* [59], *Latimeria chalumnae* [60], *Petromy-*  
128 *zon marinus* [61], *Callorhynchus milii* [62], *Crassostrea gigas* [63], *Dendroctonus ponderosae* [64], *Tribolium*  
129 *castaneum* [65], *Bombyx mori* [66], *Limulus polyphemus* [67] were downloaded from the NCBI Genome server.

130  
131 Genome assemblies and annotations of *Caenorhabditis elegans* [68], *Drosophila melanogaster*, *Strongy-*  
132 *locentrotus purpuratus* [69], *Daphnia pulex* [70], *Apis mellifera* [71], *Ixodes scapularis* [72], *Strigamia mar-*  
133 *itima* [73] were downloaded from Ensembl.

134

### 135 Calculation of exonic and genic sequence

136 For all analyses, we used the total number of bases in the downloaded assembly as the total genome size,  
137 bearing in mind that this may result in a systematic underestimation of total genome size as repeated regions  
138 may be omitted from assemblies. For example, the horseshoe crab *L. polyphemus* has a scaffold assembly of

139 1.8Gb while the reported genome size is 2.7Gb [67], a difference of almost a gigabase.

140

141 If GFF format files were available for download with a genome project, or on databases (Ensembl or  
142 NCBI), those were used preferentially. Total bases of exon, intron, intergenic, and gaps were counted from  
143 each GFF file and genomic contigs (or scaffolds) with a custom Python script (`gtfstats.py`, available at [bitbucket.org/wrf/sequences](http://bitbucket.org/wrf/sequences)). For calculations of exonic or genic bases, the script converts all gene and exon  
144 annotations to intervals and ignores the strand. Here, gene is defined as transcribed bases that are either  
145 exon or intron, regardless of coding potential. All overlapping exon intervals are merged, meaning that  
146 alternative splice sites, or exons on the opposite strand, are treated as a single interval for bulk calculations.  
147 The same is done for genes or transcripts, whichever is available. Introns are calculated as the difference  
148 of the genic set and the exonic set, as introns are typically not defined as separate features in normal GFF  
149 files. This means that any sequence that is an exon on one strand and an intron on the other is treated for  
150 these calculations as an exon, meaning those bases or their reverse complement are transcribed and retained  
151 following splicing in some case. Intergenic sequence is defined as the difference between total sequence bases  
152 and genic bases, and gaps are defined as any repeats of 'N's longer than one base.

154

155 If exons are not specified, then coding sequences (CDS) are used instead if they are available, such as  
156 for AUGUSTUS predictions. Additional non-coding features such as “microRNA”, “tRNA”, “ncRNA” are  
157 included for gene and exon calculations if they were in the standard GFF3 format. Some genomes made use  
158 of mapped RNAseq data, which implicitly included all non-coding RNAs as well. Some annotations had to  
159 determine the gene ID from the exons. For example, most of the GTF files from the earlier JGI genomes  
160 had only exons annotated, without individual features for genes or mRNAs, so the gene was then defined as  
161 all of the exons with the same feature ID even though a specific gene feature was undefined.

162

163 Exons defined as part of a “pseudogene”, or genes defined as pseudogenes, were also excluded from all  
164 counts. We justify this because pseudogenes are subject to problems of definitions and population sampling  
165 bias. Pseudogenes are defined as having the appearance or structure of normal protein coding genes, in-  
166 dependent of transcriptional potential, but that would be unable to produce a functional protein, perhaps  
167 through nonsense mutations. Therefore, a pseudogene that is transcribed and cannot code for a protein  
168 should be called a non-coding RNA. Pseudogene features are not annotated for all species, making it diffi-  
169 cult to compare broadly. Additionally, for most non-model species, the genomes are generally based upon a  
170 single individual rather than a reference for a population based on a large number of individuals. Therefore,  
171 if that single individual were homozygous for a nonsense mutation but other individuals in the population  
172 were not, that gene should not be a pseudogene.

173

174 All downstream correlation calculations and graphs were done in R. Regression was calculated using  
175 the “`lm()`” function, for linear ( $y \sim x$ ), exponential ( $\log(y) \sim x$ ), or hyperbolic ( $y \sim 1/x$ ) models, and the  
176 “`predict()`” function was used to model curves. The R source code used to generate figures is available  
177 at [bitbucket.org/wrf/genome-reannotations](http://bitbucket.org/wrf/genome-reannotations).

178

## 179 Calculation of average exon and intron length

180 The same script (`gtfstats.py`, available at [bitbucket.org/wrf/sequences](http://bitbucket.org/wrf/sequences)) also calculated the average exon and  
181 intron length, though these were analyzed separately. All non-redundant exons for all splice variants were  
182 taken into account for determination of averages. Unlike the total base calculations, genes are separated by  
183 strand. Identical exons of splice variants were treated as one exon and counted once, however, alternative  
184 boundaries were treated as a separate exons. Retained introns are treated as exons, not introns. Exon  
185 lengths were counted per non-redundant exon for each gene, summed across all genes and divided by the  
186 number of non-redundant exons across all genes. The sum of exon lengths for the average length calculation  
187 does include redundant bases from antisense transcripts or splice variants, meaning bases from antisense  
188 transcripts and alternative-boundary splice variants can be double-counted. Introns were calculated as the  
189 space between exons, calculated by gene.

190

## 191 Reannotation of select species

192 Due to unexpectedly high or low gene content, six genomes were selected for reannotation.

193  
194 The original Triad1 scaffolds of *T. adherens* [24] were reannotated with AUGUSTUS v3.0.3 [74] with  
195 the following options: -strand=both -genemodel=atleastone -sample=100 -keep\_viterbi=true -alternatives-  
196 from-sampling=true -minexonintronprob=0.2 -minmeanexonintronprob=0.5 -maxtracks=2. Species train-  
197 ing was generated using the Triad1 ESTs with the webAugustus Training server [75].

198  
199 The original Monbr1 scaffolds of *M. brevicollis* [27] were reannotated with AUGUSTUS as for *T. adherens*,  
200 using the same parameters except trained using the Monbr1 ESTs with the webAugustus Training server [75].

201  
202 For the hydrozoan *H. magnipapillata*, the original assembly was downloaded from JGI [76] and a new scaf-  
203 fold assembly was downloaded from the FTP of Rob Steele at UC Irvine (at <https://webfiles.uci.edu/re Steele/public>).  
204 For both cases, the scaffolds were reannotated using TopHat22 v2.0.13 [77] and StringTie v1.0.4 [78] with  
205 default options by mapping the reads from two paired-end RNAseq libraries, NCBI Short Read Archive  
206 accessions SRR922615 and SRR1024340, derived from whole adult animals.

207  
208 For the lancelet *B. floridae*, the Braff1 scaffolds [23] were reannotated using TopHat22 v2.0.13 [77] and  
209 StringTie v1.0.4 [78] with default options by mapping the reads from the paired-end RNAseq library, NCBI  
210 SRA accession SRR923751, from the adult body.

211  
212 For the lamprey *P. marinus*, we were unable to find any annotation as GFF or GTF, so we generated  
213 one using TopHat2 v2.0.13 [77] and StringTie v1.0.4 [78] based on the Pmarinus-v7 scaffolds from NCBI and  
214 the 16 single-end Illumina libraries from NCBI BioProject PRJNA50489.

215  
216 For the octopus *O. bimaculoides*, scaffolds were downloaded from the OIST Marine Genomics plat-  
217 form [45], and were reannotated using TopHat2 v2.0.13 [77] and StringTie v1.0.4 [78] with default options  
218 by mapping 19 paired-end RNAseq libraries from NCBI BioProject PRJNA285380.

219  
220 All reannotations are available for download as GTF or GFF files (see [https://bitbucket.org/wrf/genome-](https://bitbucket.org/wrf/genome-reannotations/downloads)  
221 [reannotations/downloads](https://bitbucket.org/wrf/genome-reannotations/downloads)).

## 223 Results

### 224 Overview and organization of data

225 A total of 68 genomes were analyzed, with 59 selected across all major metazoan groups and nine genomes  
226 of single-celled eukaryotes. For each group, only select species were taken to avoid having a single group  
227 dominate the analysis. For example, over 100 mammalian genomes are available though only six were used  
228 including three model organisms (human, mouse, dog), opossum and platypus (for the non-eutherian clades,  
229 marsupial and monotreme, respectively) and the chimp, to compare directly to the human annotation. In  
230 general, parasites were excluded because they often have unusual biology, such as the single-celled eukaryote  
231 *T. brucei*, which is known for its unusual RNA processing [79, 80].

232  
233 The smallest animal genome used in this study is that of the larvacean *Oikopleura dioica* (70Mb), while  
234 the largest is that of the opossum *Monodelphis domestica* (3598Mb). This range incorporates an existing  
235 selection bias, as some of the public genome sequencing projects selected the animal of their clade based on  
236 their known small genomes. Two examples of this are the shark *C. milii* and the pufferfish *T. rubripes*. Yet  
237 it must be considered that in terms of genomes, they may not be representative of their clades; many other  
238 shark genomes are estimated to be over 10Gb (haploid genome size) [81], such that a shark genome of only  
239 1Gb may not be “normal” for sharks.

240



241 Additionally, not all of the species in the sample were sequenced or annotated with the same method,  
242 making direct comparison more challenging. For instance, some of the earlier genomes (such as *Branchios-*  
243 *toma floridae* and *Trichoplax adherens*) were annotated only with Sanger ESTs (order of tens of Mb), which  
244 were used to train gene prediction algorithms. Because not all genes have features easily captured by the  
245 EST training, several different results are expected: some genes are split because internal exons are not  
246 properly found or may have misassemblies in the draft genomes; adjacent genes on the same strand are  
247 fused; or genes are omitted entirely.

248

## 249 Connection between annotation and understanding of genomes

250 Genome projects of non-model species usually report protein coding regions of a genome. Broadly, there are  
251 two methods of doing this, comparison to other proteins from other genomes and by aligning mRNA from  
252 ESTs or RNAseq [3]. In practice, improvements in methods have made it relatively easy to directly predict  
253 proteins from the genome sequence. However, untranslated regions (UTRs) are difficult to predict and often  
254 require evidence from ESTs or transcriptome sequencing for accurate predictions, and this has implications  
255 for our measurements of total exons in each genome. This means that even in a “perfect” genome where  
256 all coding genes are correctly predicted by an annotation program (perhaps based on similarity to a related  
257 species) that the precise positions and amount of UTR may still be unknown, resulting in an underestimation  
258 of the amount of exonic sequence (Fig 1A and B). Because of this, the reliance on coding genes is likely to  
259 underestimate the usable fraction of the genome.

260

261 To illustrate this, one may consider a hypothetical eukaryotic genome of 60Mb with 10,000 genes and  
262 equal fractions of exons, introns, and intergenic sequence, at 20Mb each. For simplicity, all exons are the  
263 same size (in this example, 200bp), so an average gene (with ten-exons) may contain one exon for the 5’-  
264 UTR, and one for the 3’- UTR, and the remaining eight exons are coding. Based on the above annotation  
265 scheme, 20% of the exonic fraction (those containing the 5’ and 3’-UTRs) is missing in the final annotation.  
266 Two introns per gene are also missing (the first and last introns), about 18% of the intronic fraction. This  
267 would yield a final annotation where exons are predicted as 16Mb (26.6% of the genome) and introns as  
268 15.5Mb (25.9% of the genome). This would also indicate that 52.6% of the genome is genes, a substantial  
269 underestimation from the actual value of 66.6%.

270

271 However, other systematic errors can result in an overestimation of the genic fraction. If we consider mul-  
272 tiple genes on the same strand, in a head-to-tail arrangement, and recall that UTRs are often not predicted,  
273 then an exon containing the stop codon with a 3’-UTR may be omitted and the predicted gene may continue  
274 into the next gene (Fig 1C). If it is assumed that the majority of coding exons are correctly predicted, then  
275 if such predictions were made systematically one may expect that the measured amount of exons does not  
276 deviate much from the true exonic fraction. However, because introns are defined as the removed sequence  
277 between exons of the same gene, then the sequence between the two genes that should have been defined as  
278 intergenic will instead be defined as intronic, thus raising the intron:intergenic ratio above 1.

279

280 The above problems assume that the genomic assembly is nonetheless correct, yet the annotation is  
281 directly affected by assembly problems as well. Of the two main sources of problems, repeats [82] and het-  
282 erozygosity [26, 42, 63, 83], repeats often result in breaks in the assembly that could split genes (Fig 2A).  
283 Genes that are split at contig boundaries are likely to have exons missing (or on other scaffolds) and thus  
284 the sequence that should be defined as introns would be instead defined as intergenic (Fig 2B).

285

286 For normal diploid genomes (wild strains, not inbred lab strains), heterozygosity is not uniform across  
287 the genome. Some regions are identical between the two haplotypes (hence are homozygous alleles or loci),  
288 while others may vary by SNPs, short indels, or copy numbers of repeats, exons, or even genes. For sequences  
289 that are identical between both haplotypes, the contigs are generally kept as is, while a more complex deci-  
290 sion must be made for the heterozygous loci. During normal genome assembly, the assembler evaluates the  
291 coverage at each “bubble” (where the de Bruijn graph has two paths out of a node, and both paths merge  
292 again at the next node) and ultimately has to retain one of the paths at the exclusion of the other (Fig 3A)

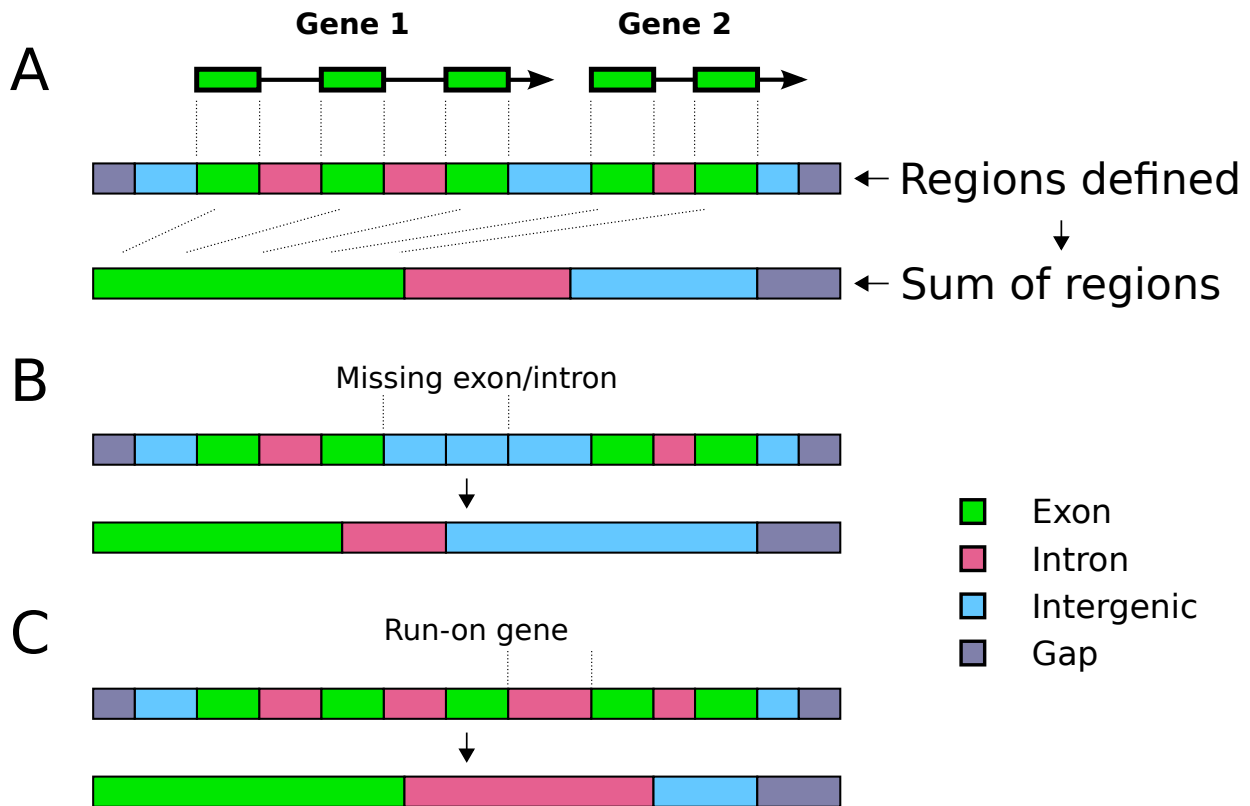

Figure 1: **Schematic of misannotations and the effects on coding fraction analyses** (A) In a normal case, two hypothetical genes on the same strand are identified. The exons and introns are defined, and the total lengths of those features are summed and displayed in the bars below. Because real genome assemblies can often contain gaps, sample gaps are also shown at the edges of the segment. (B) If individual exons (or potentially whole genes) were missing, then the measured total exons and introns would be smaller than the real values, and the ratio of intron:intergenic would decrease. (C) If neighboring genes were erroneously declared to be contiguous, the exonic fraction is mostly unchanged but the intron:intergenic ratio would increase.

293 (also see schematics in [83] and [84]). This merging is the essential process that creates the reference genome,  
 294 even though that reference is an arbitrary merge of the two haplotypes. Therefore, it must be kept in mind  
 295 that predicted genes or proteins in reference genomes may not be identical to either haplotype.

296

297 Regions with relatively high heterozygosity may fail to be merged in this way, leaving contigs of both  
 298 haplotypes in the assembly (Fig 3C). During subsequent scaffolding steps, contigs of separate haplotypes  
 299 can be fused head-to-tail if mate pairs are bridging the unique regions. Because this head-to-tail joining is  
 300 an artifact, no reads should map at the junction point, resulting in a region of zero coverage at the junction  
 301 and flanked by regions where coverage is half of the expected value (Fig 3D). One additional feature may  
 302 reveal this artifact: exons in the unmerged sections may be individually annotated but mapped ESTs or  
 303 *de novo* assembled transcripts may show a staggered exon pattern (Fig 3E) because transcripts can only  
 304 map to one of the two possible exons (2a or 2b, 3a or 3b). This may increase the ratio of intron:intergenic  
 305 sequence (Fig 3F), but also falsely indicate that splice variation is more prevalent for this gene.

306

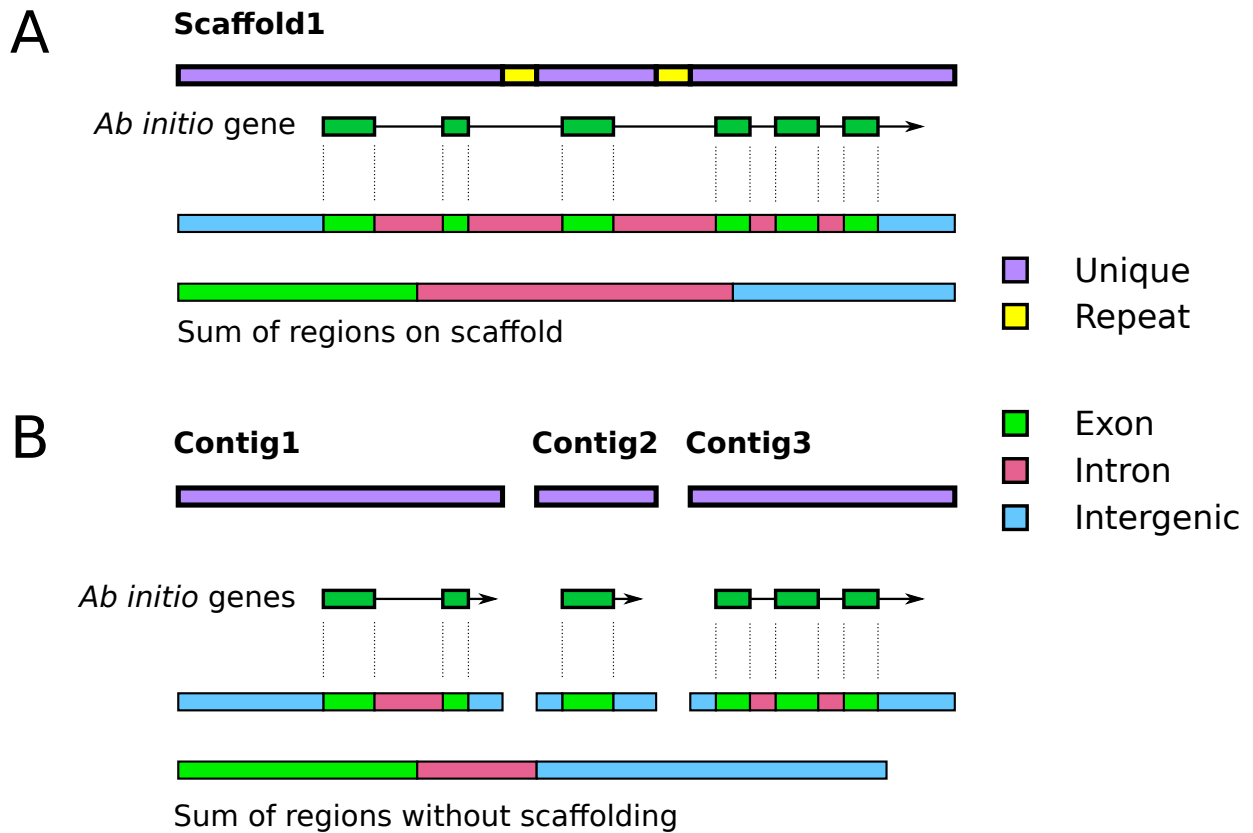

Figure 2: **Schematic of the effects of scaffolding and repeats on genic fraction analyses** (A) For a hypothetical scaffold in a genome assembly, two identical repeats are found within introns. The gene is correctly predicted to span the two repeats and the regions are defined below as in Fig 1. (B) For the case without scaffolding, or where the assembler breaks the assembly at repeats (or other high coverage regions), three contigs are generated. Note that the numbers are arbitrary, and in a real assembly they are unlikely to be in order. When annotated, all of the exons are correctly found, but the connections between them are missing for the single exon on Contig 2, resulting in a loss of intronic sequence. The final measured amount of exons is comparable, but the intron:intergenic ratio would decrease.



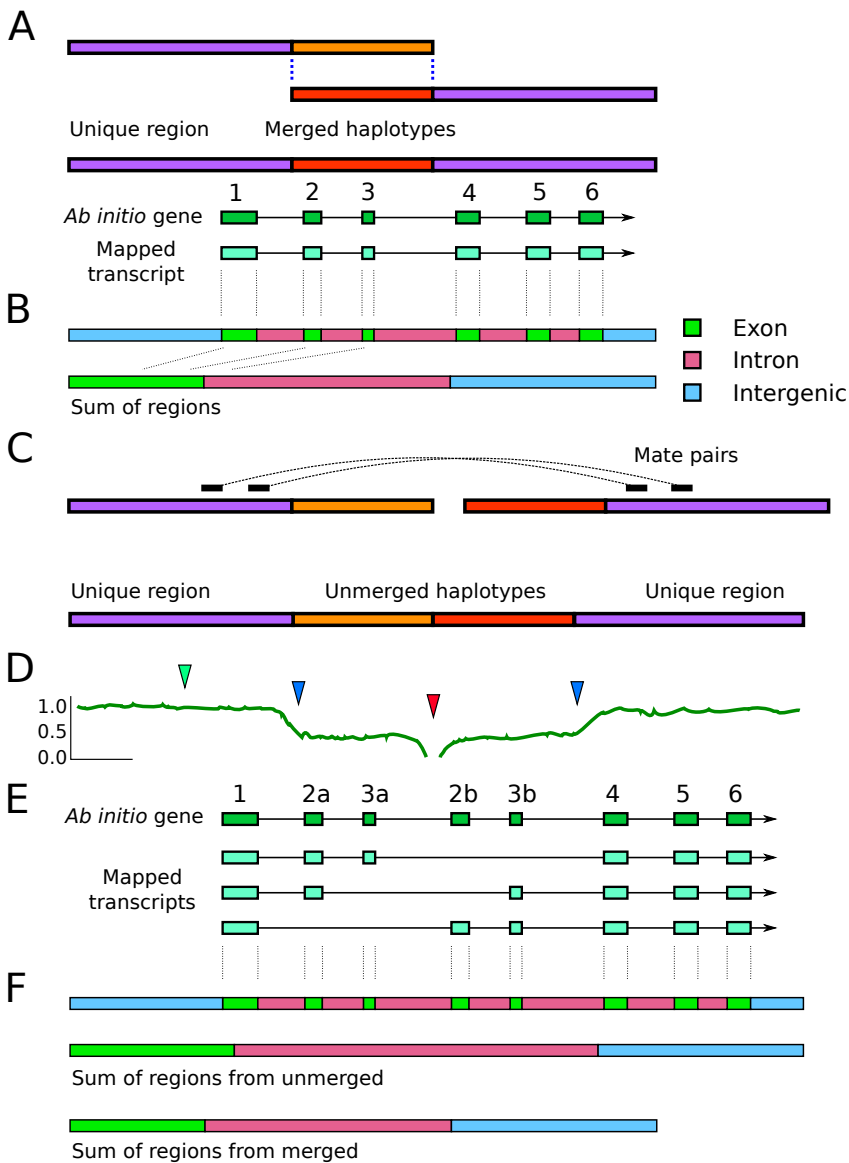

**Figure 3: Schematic of misassembly and the effects on genic fraction analyses** (A) During assembly, regions that are heterozygous (differing by SNPs or indels) are combined to make a single reference contig. When genes are predicting that this locus, or when assembled transcripts are aligned to the genome, the correct exon structure is found. (B) Regions are defined as exon, intron, or intergenic, as in Fig 1. (C) Reference genomes are a mix of the maternal and paternal haplotypes, but not uniformly. Rather than being merged into a single sequence, highly heterozygous regions may be assembled as different contigs that get erroneously fused during scaffolding steps. Mate pairs that bridge the two purple unique regions will instead result in a head-to-tail joining of the two unmerged haplotype sequences. (D) Hypothetical plot of read coverage across the contig. The green arrow shows a region of normal coverage (1x) while the blue arrows show sites where coverage is reduced because reads for each haplotype map separately. At the fusion point between the two haplotypes (red arrow), no reads will map since the sequence is an artifact, or is represented by a gap. (E) Mapped transcripts (or ESTs) or transcripts derived from mapped RNAseq reads (such as by Cufflinks or StringTie) may only be mapped to one of the two haplotypes, thereby producing a staggered exon structure. A mapped transcript can only align to either exon 2a or 2b, but not both, likewise for 3a or 3b, yet all other exons are unique and would align correctly. Genes predicted *ab initio* may annotate both sets of exons (2a/3a and 2b/3b), which may result in a duplication in some part of the protein, or a premature stop codon if 3a and 2b are out of phase. (F) For this hypothetical case, the sum of the regions would appear to have increased total exon size and the total intron size compared to the same genomic locus where the haplotypes were correctly merged.

## 307 Reannotation and changes following RNAseq reannotation

308 Keeping in mind the above error sources, some of the genomes used in our study had obvious problems of  
 309 too much or too little genic content that would confound our analyses. For instance, the total amount of  
 310 exons in the JGI annotation of *T. adherens* (Triad1) was only 14Mb, over twofold lower than the related  
 311 species, the placozoan *H. hongkongensis*, and thus it was expected to contain many more or longer genes  
 312 than were present in the original Triad1 annotation. Because of this, we remade a gene annotation for  
 313 five of the species (see Methods) and used two additional publicly available annotations for *N. vectensis*  
 314 and *A. queenslandica*. For most species, the reannotation dramatically increased the total amount of exons  
 315 as well as the total bases of genes (Fig 4). The only exception was *B. floridae*, where the original anno-  
 316 tation had predicted 90% of the genome as genes, while the reannotation had annotated only 44.8% as genes.

317

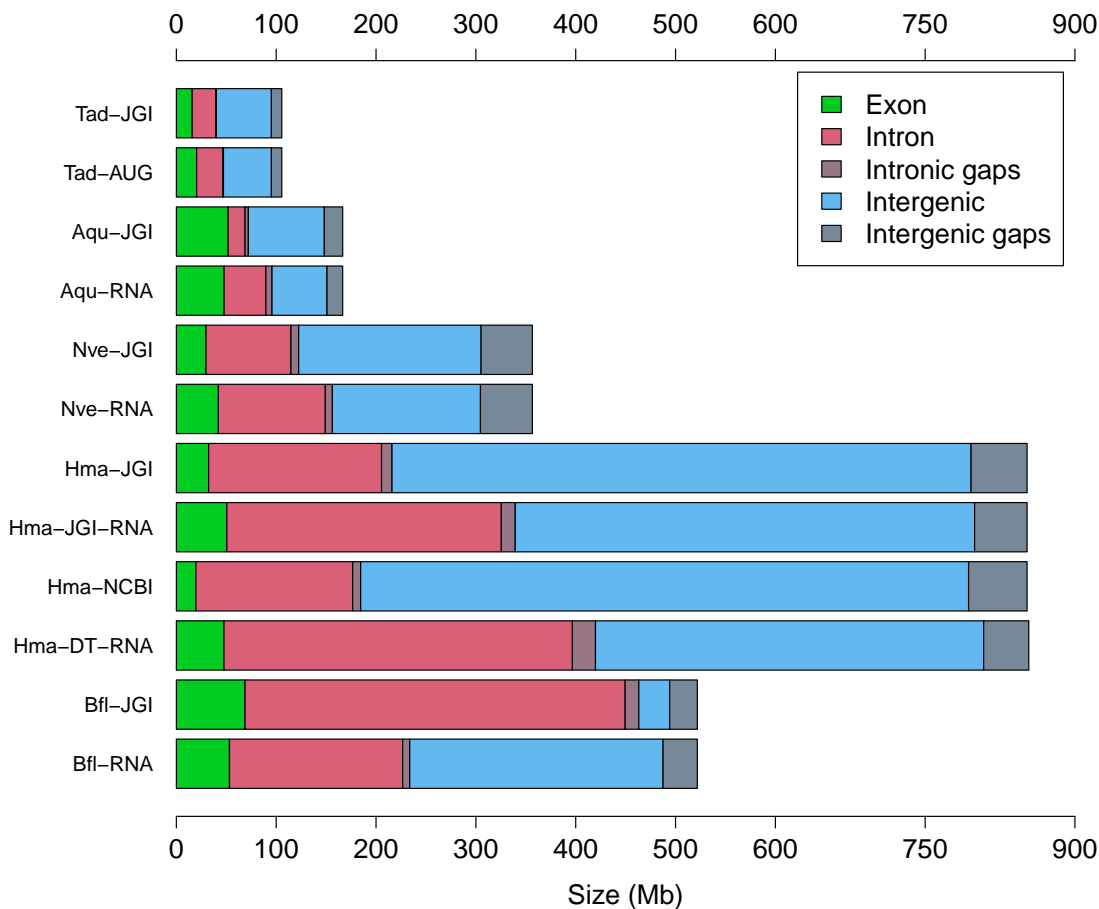

Figure 4: **Proportions of exons, introns, and intergenic sequences** Barplot showing the summed proportions of genomes composed of exons (green), introns (red) and intergenic sequences (blue). The reannotation for *O. bimaculoides* was not shown for clarity, as this genome is substantially larger than the others. Abbreviations are as follows: Tad:*T. adherens*, Aqu:*A. queenslandica*, Nve:*N. vectensis*, Hma:*H. magnipapillata*, Bfl:*B. floridae*. JGI refers to the original annotations for each species downloaded from the JGI Genome Portal. RNA refers to reannotation (see Methods) with RNAseq. Hma-NCBI is the NCBI GNOMON annotation of *H. magnipapillata*. Hma-DT-RNA is the Dovetail reassembly of *H. magnipapillata* annotated with RNAseq. AUG is the reannotation using AUGUSTUS for *T. adherens*.

318 We then compared the ratio of intron:intergenic sequence across seven of the reannotated species (Fig 5).  
 319 Across these species, reannotation significantly shifted the ratio of intron:intergenic sequence, approaching a  
 320 1:1 ratio (difference from 1:1 ratio, paired two-end t-test, p-value: 0.014). For *M. brevicollis*, the genome is

321 very small and the majority is exons, so the reannotation was likely to change gene boundaries (separating  
322 run-on genes) rather than defining many new genes; our reannotation contains 10,864 genes compared to  
323 the 9,196 genes in Monbr1 “best models”.

324

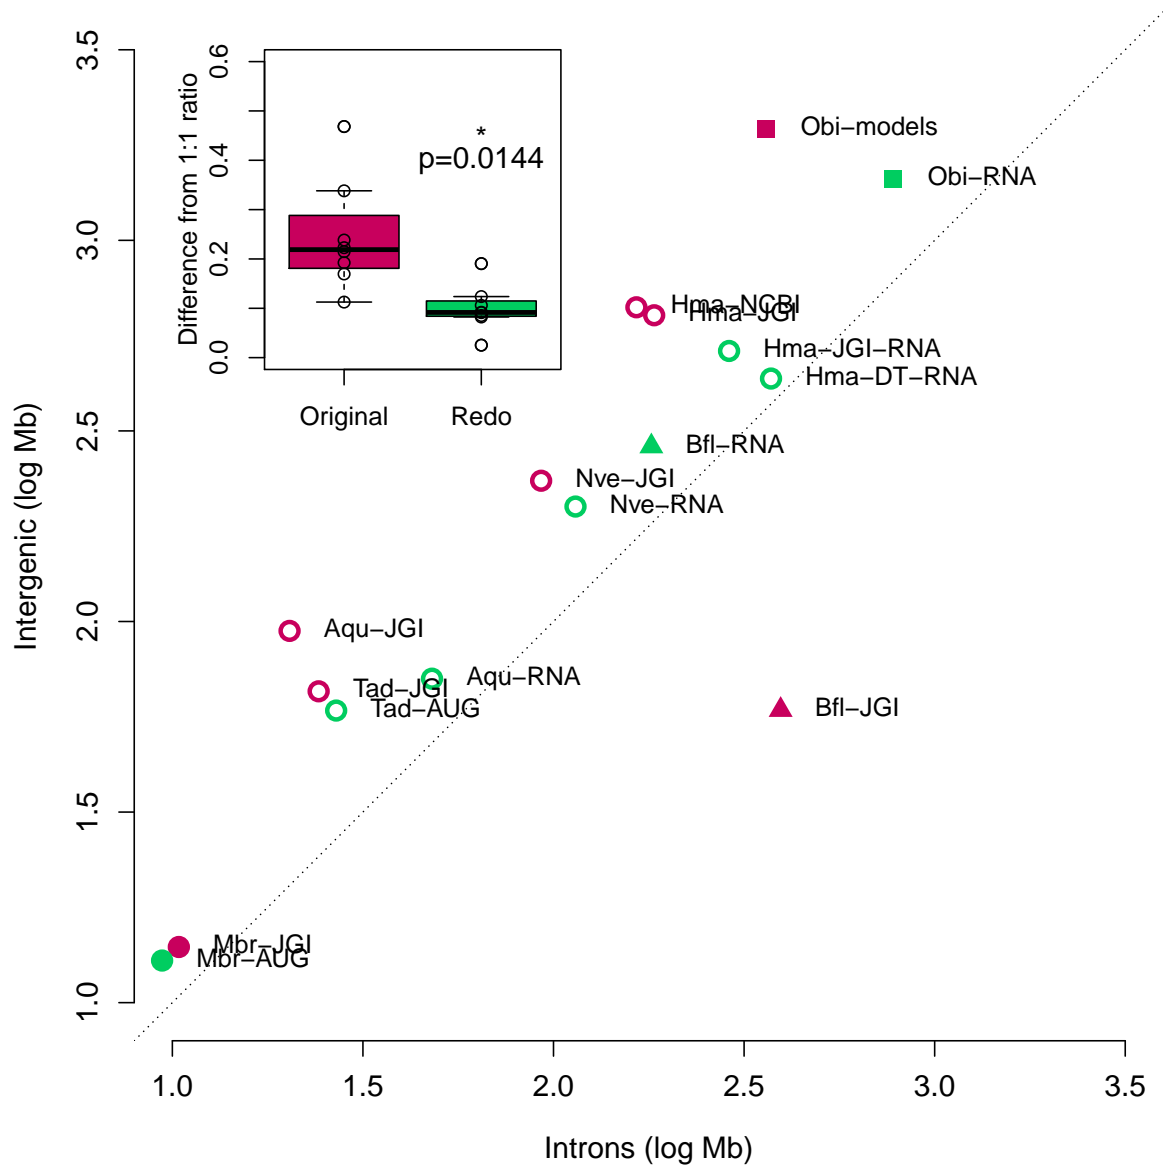

## 325 Basic trends related to genome size

326 We observed linear correlations of total genome size to both total intronic size and intergenic size (Fig 6)  
327 (p-value:  $< 10^{-37}$  for both parameters). A much weaker correlation is observed for exons ( $R$ -squared:0.3856,  
328 p-value:  $10^{-8}$ ). Because the total amount of exons in the largest genomes can be several times greater than  
329 the total size of the smallest genomes used in the study, a correlation is likely to be observed. Thus, the  
330 total amount of exons is necessarily affected by total genome size, even if this is not strongly correlated.

331

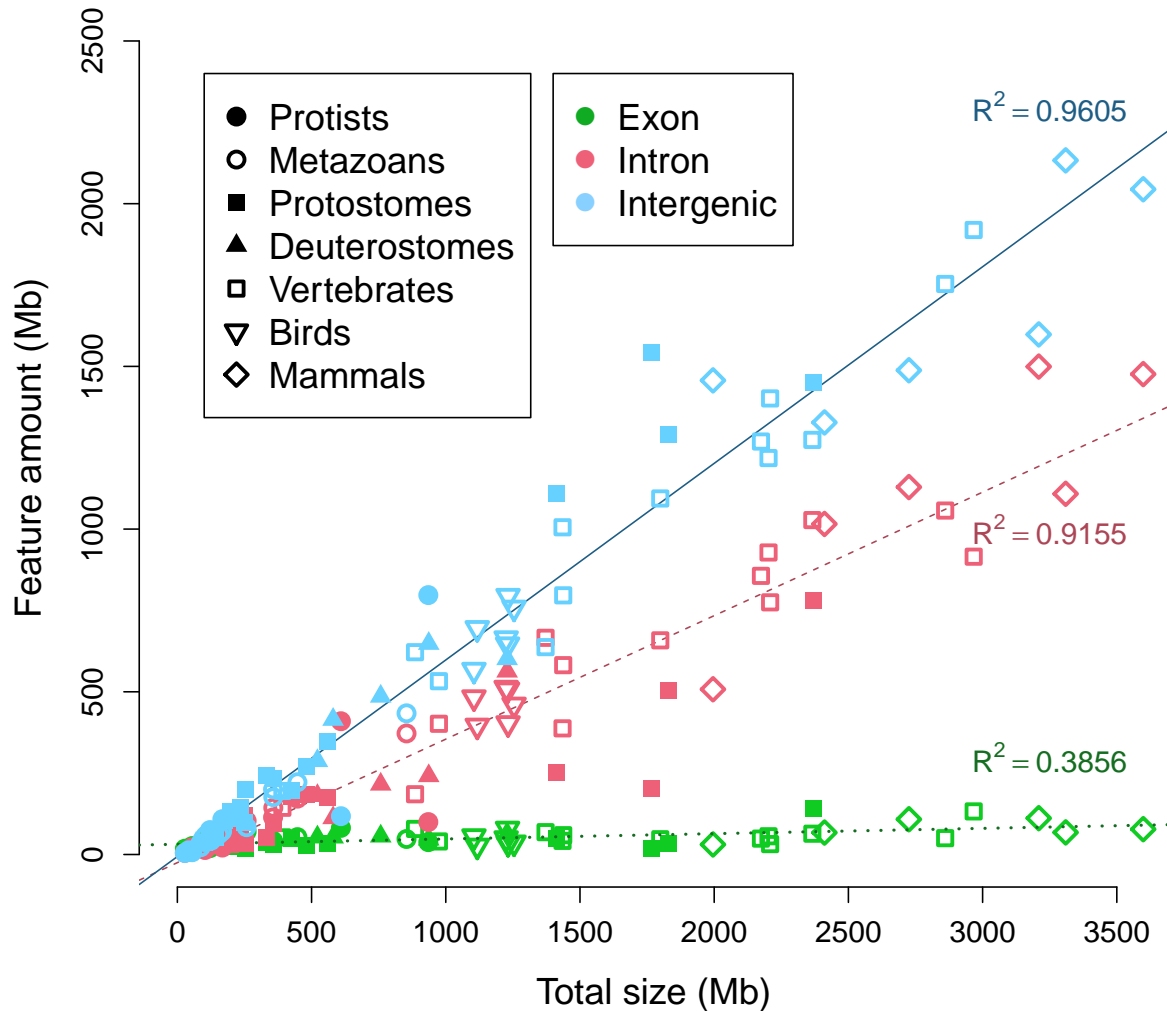

Figure 6: **Comparison of features to total genome size** The sums of exons, introns, and intergenic regions are plotted against total genome size. Linear coefficients of determination of the three features are displayed by their respective lines. For legend symbols, Deuterostomes refers to all invertebrate deuterostomes, Vertebrates excludes Reptiles, Birds and Mammals.

## 332 Average intron and exon length

333 The average length of introns linearly scales with the total genome size (Fig 7), in agreement with another  
334 study [18]. However, the average exon length is clearly constrained across animals relative to total genome  
335 size, and this may be related to interactions with nucleosomes [85]. Most species have an average exon

336 length between 200 and 300 bases (mean of 263bp), higher than values reported from previous surveys of  
337 exon length [21, 86]. It must be stated that the average values presented here should not be taken as final,  
338 because variations in format of the annotations and quality of the genomes will affect the values. Since many  
339 genomes are only annotated with *ab initio* gene predictions, UTR exons may be missing from the annotation  
340 and all downstream calculations. Given that the first exon and intron tend to be longer than other exons  
341 and introns [21], respectively, absence of five-prime UTRs may result in an underestimation of the average  
342 exon length for that species.  
343

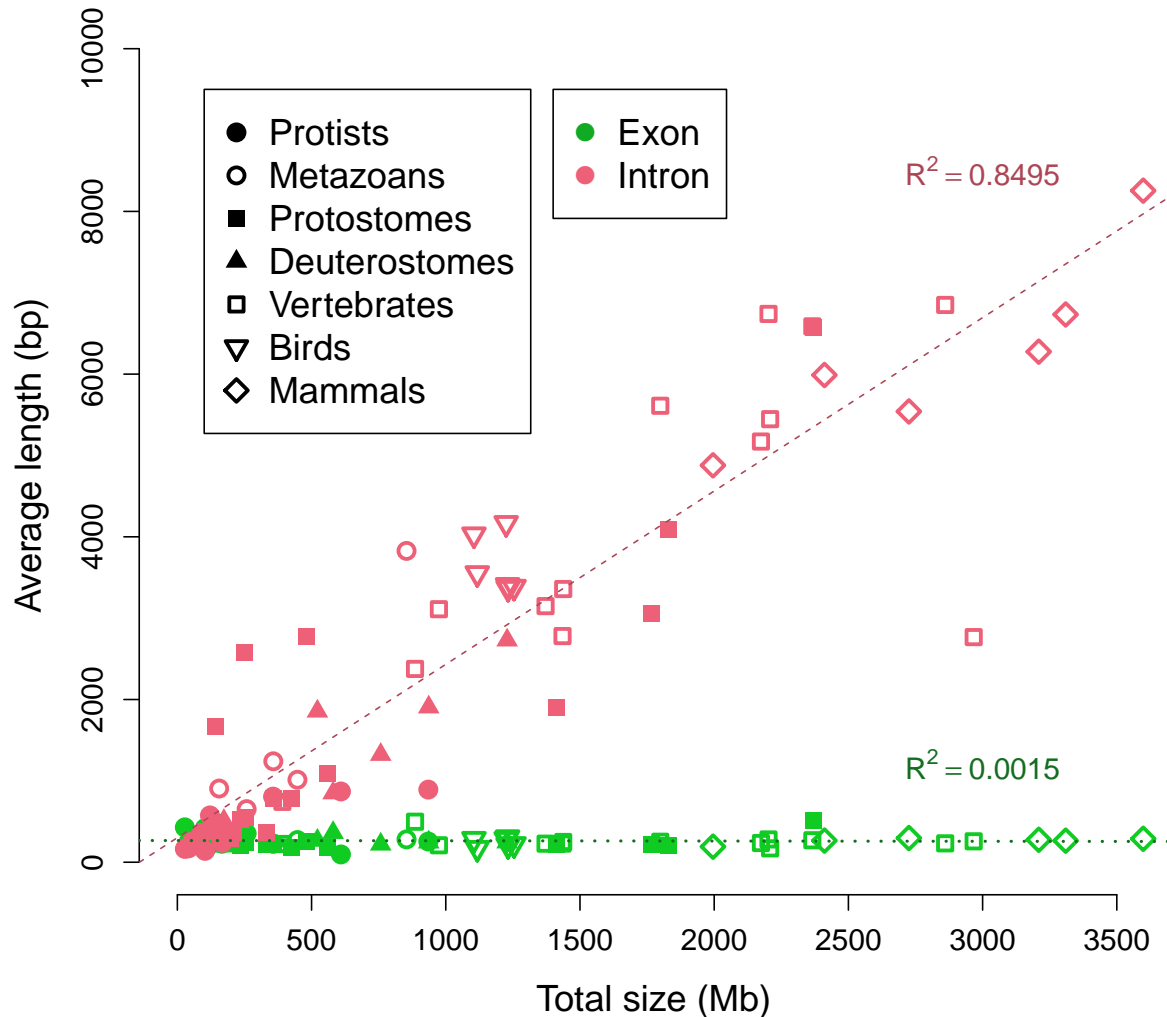

Figure 7: **Average length of exons and introns** Plot of the average length of exons (green) and introns (pink) as a function of total genome size across all species in this study. Linear coefficients of determination are displayed next to the green (dotted) and red (dashed) linear fit lines, for exons and introns, respectively.

#### 344 **Nature of the exonic fraction**

345 The total amount of exons is not strongly correlated with total genome size (as seen in Fig 6). However, there  
346 is a hyperbolic correlation of the relative fraction of exons (megabases of exons divided by total megabases)  
347 compared to total genome size (Fig 8). The smallest genomes are dominated by exons, while the largest  
348 genomes are dominated by introns and intergenic regions. This implies a relatively fixed pool of exons or

349 coding space that becomes spread over the genome as the total size increases. The hyperbolic trend resembled the observed hyperbolic relationship between total genome size and coding proportion [18]. As coding exons are a subset of total exons, measurements of total exons may be a reasonable approximation of coding sequence, but not necessarily vice versa.

353

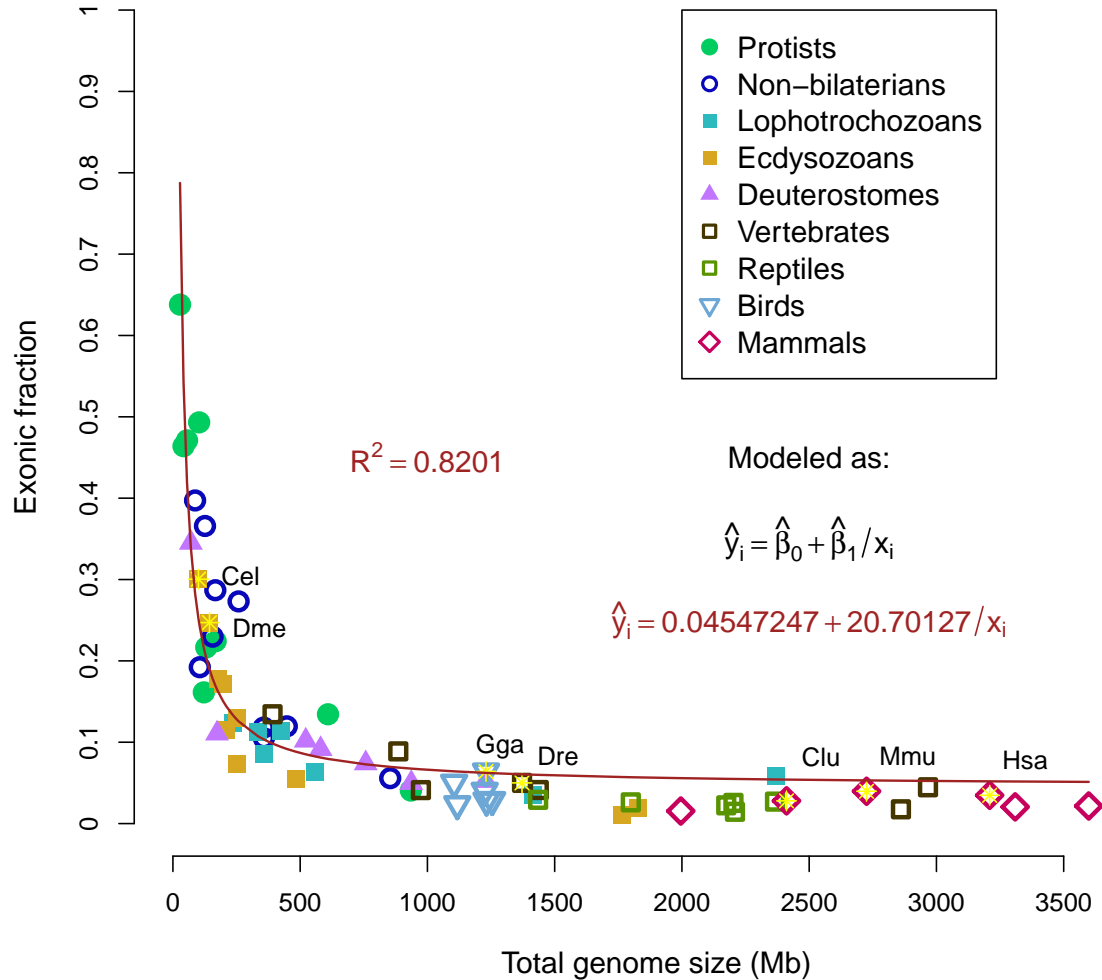

Figure 8: **Exonic fraction compared to total genome size** Relative fraction of the genome that is defined as exons compared as a function of total size. Coefficients of determination of a hyperbolic model is displayed. Seven model organisms (human, mouse, dog, chicken, zebrafish, fruit fly and nematode) are indicated by three-letter abbreviations. The formula for the fitted model is displayed in red.

### 354 **Ratio of introns to intergenic**

355 Because both intronic and intergenic fractions displayed a linear correlation to total genome size (Fig 6),  
 356 we next examined the connection between the two fractions. While many species have a ratio of in-  
 357 trons:intergenic approaching 1:1 (R-squared: 0.8286, p-value:  $5.6 * 10^{-27}$ ), the majority of genomes are  
 358 composed of sequence annotated as intergenic regions (Fig 9).

359



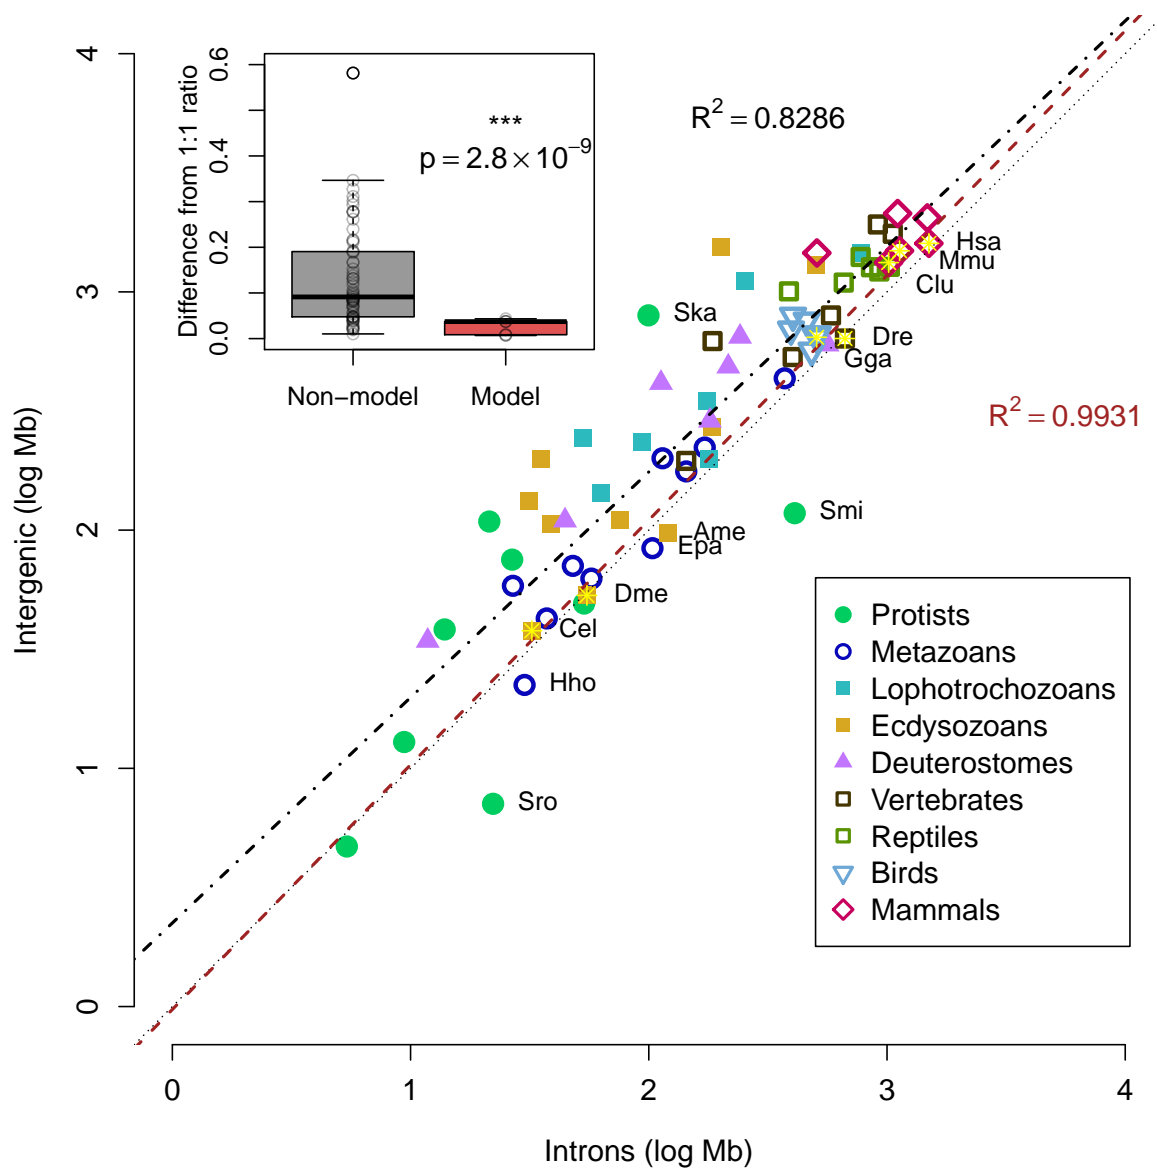

Figure 9: **Comparing intronic and intergenic fractions** Log-scale plot of total intronic size versus total intergenic size. The dotted line shows a ratio of 1:1 as a reference, although most genomes are above this line. Seven model organisms (as in Fig 8) are indicated by three-letter codes with yellow stars. Black dashed line displays the linear fit of all species in the study (R-squared: 0.8286, p-value:  $5.6 \times 10^{-27}$ ), while the red line displays the linear fit for only the seven model organisms (R-squared: 0.9931, p-value:  $1.3 \times 10^{-6}$ ). Names are displayed for model species, two dinoflagellates (Ska: *S. kawagutii*, Smi: *S. minutum*) and select species with ratios of intron:intergenic greater than 1, choanoflagellate *S. rosetta* (Sro), honeybee *A. mellifera* (Ame), anemone *E. pallida* (Epa), and placozoan *H. hongkongensis* (Hho). All other species names are omitted for clarity. The inset graph shows box plot of difference of the intron:intergenic ratio to 1, showing the model organisms (red) have significantly different ratios compared to the rest of the genomes (paired two-end t-test, p-value:  $2.8 \times 10^{-9}$ ).

360 Because of the potential issue of gene annotation accuracy, we tested the linear correlation of in-  
 361 trons:intergenic sequence for seven model organisms likely to have accurate annotations. A better linear

362 fit was observed when restricted to the model organisms (R-squared: 0.9931, p-value= $1.3 \times 10^{-6}$ ), sug-  
363 gesting that deviations from the 1:1 ratio of intron:intergenic sequence are due to missing annotations,  
364 rather than biological differences. Genomes of model organisms are significantly closer to the reference line  
365 (two-tailed t-test, p-value:  $< 10^{-7}$  for either absolute distance from 1:1 reference or absolute difference of  
366 intron:intergenic ratio to 1), suggesting that the better annotations of model organisms predict a ratio of  
367 1:1 of intron:intergenic sequence. Overall, the comparison of genomes of model to non-model organisms is  
368 compatible with the hypothesis that the predicted amount of the genome that is transcribed varies more by  
369 annotation quality than biological differences.

370  
371 We then examined if there is a difference between genomes of vertebrates and invertebrates. No sig-  
372 nificance difference is observed between the two model invertebrates and five vertebrates (two-tailed t-test,  
373 p-value:0.99). Among all species in the study, significant differences are tenuous and highly dependent on the  
374 species selected (Figure 10). For example, chordates against non-chordates is not significant (p-value:0.128)  
375 while vertebrates against invertebrates is significant (p-value:0.008). However, the observed significance  
376 appears to be an artifact of the abundance of low-quality genomes of protostomes, since comparison of verte-  
377 brates against non-bilaterians is not significant (p-value:0.83). This difference is most simply explained by the  
378 similarity between vertebrate groups. That is to say, annotation of a new mammalian genome is facilitated by  
379 existing knowledge of gene structures in other mammals, rather than true differences in genome organization.

380  
381 Several genomes are below the 1:1 reference line, indicating slightly more introns than intergenic, such as  
382 the choanoflagellate *S. rosetta*, the honeybee *A. mellifera*, the anemone *E. pallida*, and placozoan *Hoilungia*  
383 *hongkongensis*. For *A. mellifera*, it was noted that improvements in versions of the genome also included bet-  
384 ter placement of repetitive intergenic sequences [71], suggesting that the relative surplus of introns is merely  
385 due to the absence of some intergenic sequences in the final assembly. As for *E. pallida* and *H. hongkon-*  
386 *gensis*, these species stand out as having relatively high heterozygosity, 0.4% [87] and 1.8% (manuscript  
387 in preparation), respectively. Although these values are lower than the observed heterozygosity in many  
388 other invertebrates [88], some highly heterozygous sequences may have caused assembly problems during  
389 scaffolding (as proposed in Fig 3).

## 391 Evolution of the genic fraction

392 The amount of the genome that is composed of genes was highly variable across the genomes in our study,  
393 ranging from 12.5% up to 87.1% of the genome. Unlike the exonic fraction, the relationship of the fraction  
394 of the genome that is genes to the total size is less obvious (Fig 11), in part because this parameter is  
395 most subject to gene annotation accuracy. The fraction of the genome that is exons (and perhaps coding)  
396 appeared relatively fixed (Fig 8), yet the fraction that is intron was linearly correlated to the total size  
397 (Fig 6), therefore the fraction that is genes (exons and introns combined) was expected to be a combination  
398 of the two trends. Three correlation models were tested: hyperbolic (double-log), exponential (single-log),  
399 and linear. Of these, the hyperbolic model fit best (R-square: 0.3649, p-value:  $< 10^{-8}$ ), and no correlation  
400 was found for the other models. Restricting the linear model to only genomes larger than 500Mb found  
401 essentially no correlation (R-squared:  $2.5 \times 10^{-4}$ ), suggesting that the genic fraction is unrelated to total  
402 genome size in large genomes but not small genomes.

403  
404 Again, the importance of gene annotation accuracy cannot be ignored and needs to be emphasized. When  
405 restricting to the seven model organisms, the range of values is narrower, from 44.9% to 62.9%. The same  
406 three correlation models were applied to the genomes of model organisms, again finding that the hyperbolic  
407 model best explained the variation in the genic fraction of model organisms (hyperbolic R-squared: 0.8091,  
408 p-value=0.0058; exponential R-squared=0.6709; linear R-squared=0.6835). Rather than simply having no  
409 correlation to total size, these results suggest that the genic fraction is fixed at around 50% in large genomes.

410

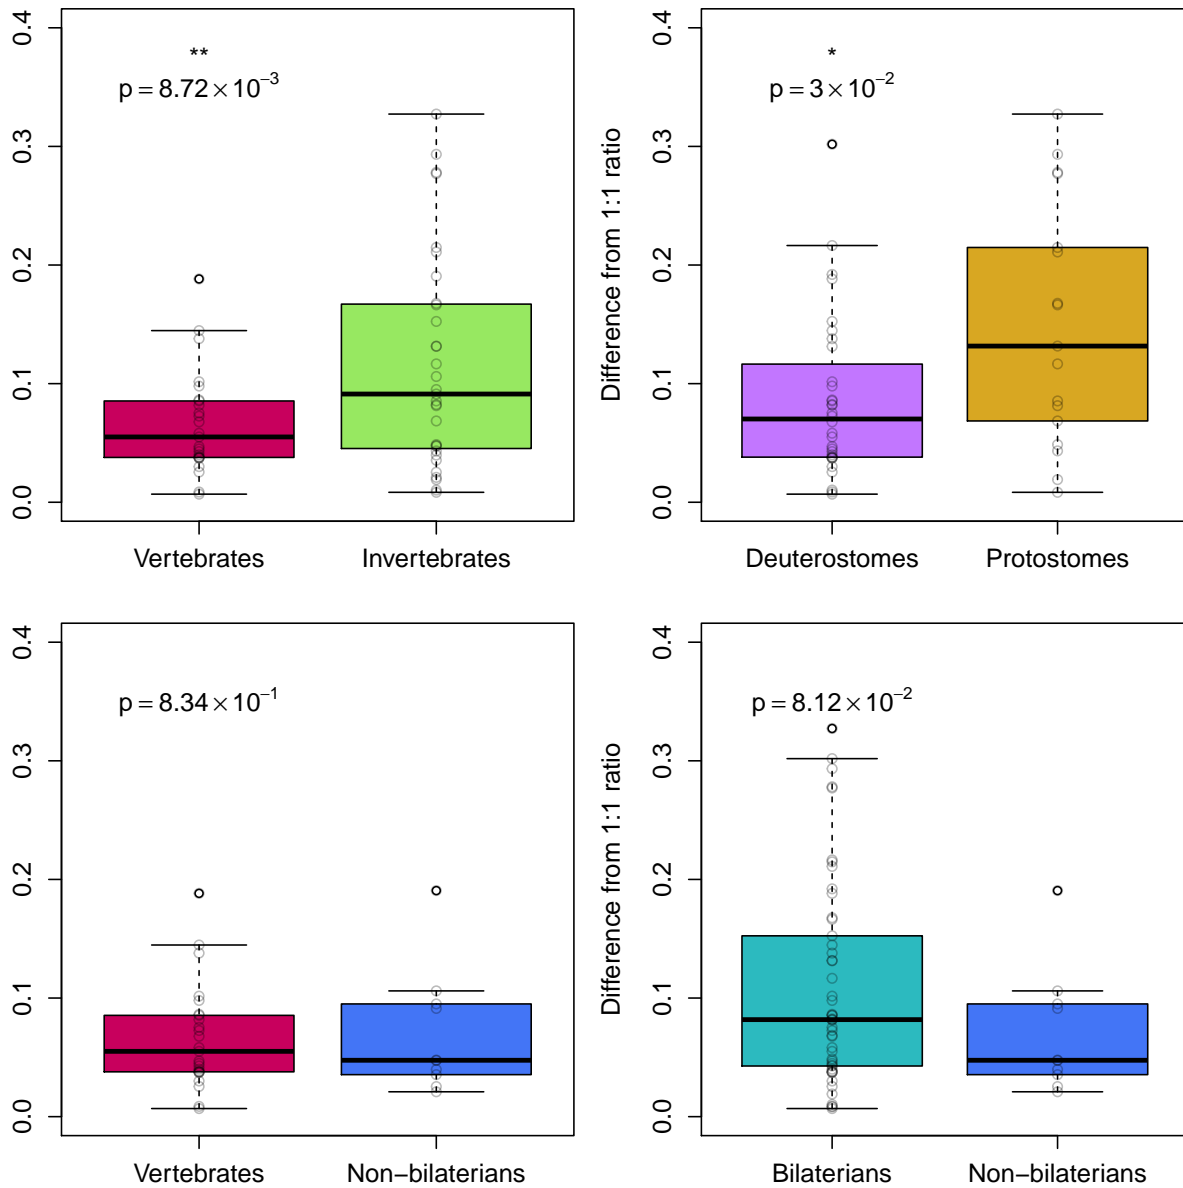

Figure 10: **Comparing intron-intergenic ratios among animal groups** Difference of the intron:intergenic ratio to 1 across four pairs of animal groups. Invertebrates (green) includes all non-bilateria taxa. Deuterostomes and protostomes are both assumed to be monophyletic.

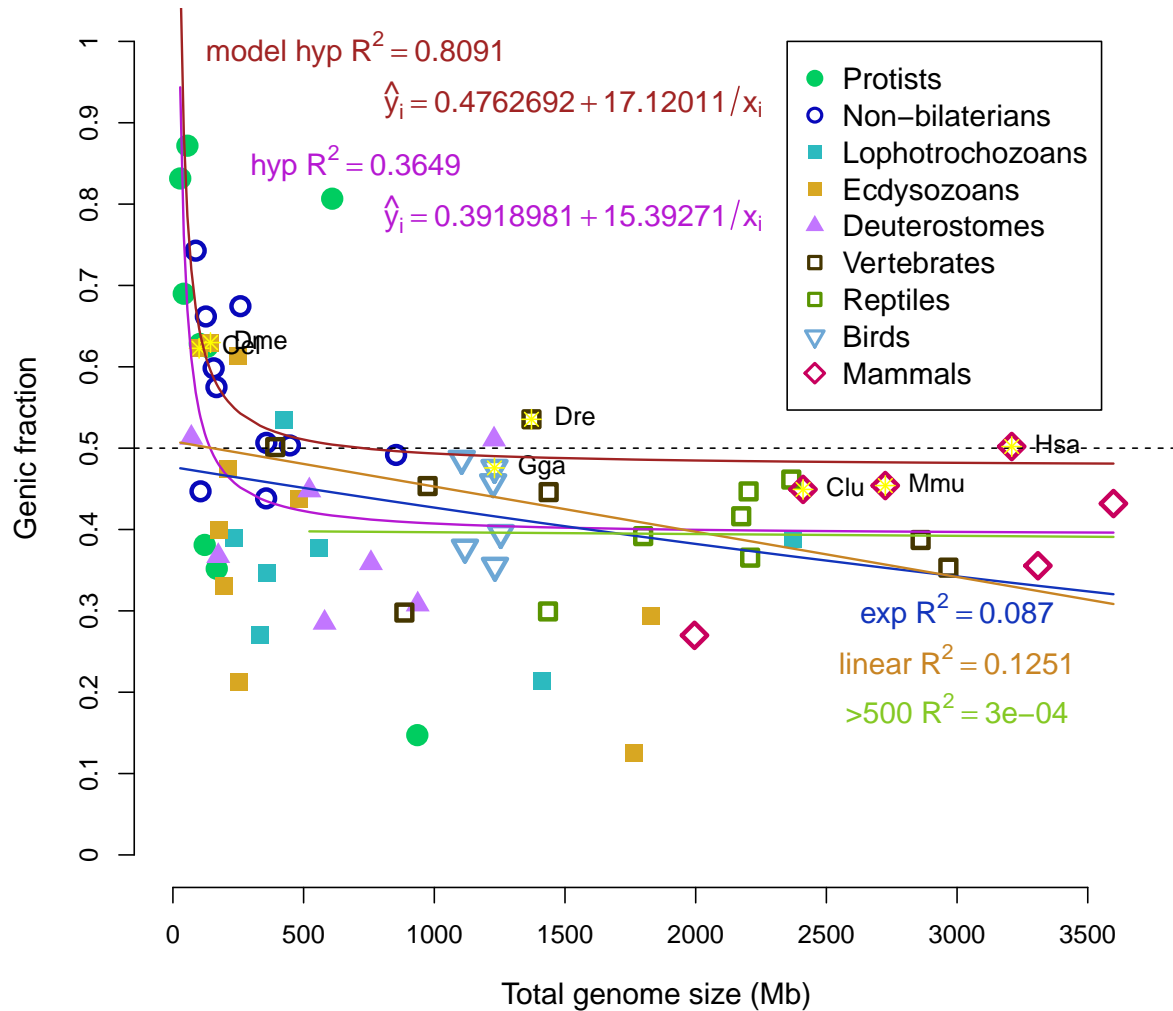

Figure 11: **Genic fraction compared to total genome size** Relative fraction of the genome that is defined as genes compared as a function of total size. A number of correlative models (hyperbolic in purple, exponential in blue, linear in orange) were tested and coefficients are displayed. Linear correlation is expected to be zero if genic and intergenic fractions “expand” indifferently after a certain size, which appears to be around 500Mb. Linear correlation including only genomes larger than 500Mb is also displayed as the green line. Seven model organisms (as in Fig 8) are indicated by three-letter codes and yellow stars. The hyperbolic correlation model for the seven model organisms is shown in red. The formulae for the fitted models are displayed in red and purple, for model organisms and all organisms, respectively.

## 411 Discussion

### 412 Diagnostic relationship of introns to intergenic sequence

413 An increasing number of genomes of any non-model organisms are sequenced to answer evolutionary ques-  
414 tions. For example, genomes of taxa from all four non-bilaterian groups were recently sequenced to under-  
415 stand how similar these genomes are to humans [8,24,33,34], and found that we share much more in terms of  
416 genes with these groups than had been previously thought. Yet, one of the main challenges in studying the  
417 genomes of non-model organisms is that there is little *a priori* information about gene structure or content.  
418 It would be expected that finding orthologs of human genes is relatively easy, but does not inform us about  
419 other genes that differ from humans. How should we know when we have found all of the genes? Our results  
420 provide some guidance here and suggest that there is a constant ratio of introns to intergenic sequence in  
421 all animals. This relationship holds even for animals with small genomes, such as the model organisms *D.*  
422 *melanogaster* and *C. elegans*, suggesting that organisms with small genomes and many currently sequenced  
423 invertebrates are subject to the same forces as organisms with large genomes.

### 425 Unusual cases of genomes

426 Based on our model, the majority of genomes appear to be underannotated, in that substantial portions of  
427 the genome are not predicted to be transcribed when in fact many probably are. However, only two species,  
428 the lancelet *B. floridae* and the dinoflagellate *S. minutum*, display a dramatic trend in the opposite way,  
429 that is, the majority of the genome is annotated as genetic (being primarily introns).

430  
431 For the lancelet *B. floridae*, the original JGI gene models had annotated almost 90% of the genome as  
432 genes [23], the majority (85%) of that sequence being introns. Our reannotation of this genome displays the  
433 opposite trend, where more of the genome is intergenic than intronic. The original JGI annotations did not  
434 include any validation of the predicted genes, as predictions were made using mapped ESTs only as inputs  
435 for the gene model training. From this, we consider it more likely that the RNAseq-based transcripts more  
436 accurately resemble the true gene structures, albeit missing some genes. In addition, other evidence suggests  
437 that the *B. floridae* annotations may have been unusual or erroneous [89]. A study of domain combinations  
438 found that *B. floridae* had by far more fusions than any other species (across all eukaryotes) and had to be  
439 excluded from the analysis [90], precisely the expected result if the majority of genes were erroneously fused.

440  
441 The only other species have a much larger ratio of intron to intergenic was the dinoflagellate *S. minutum*.  
442 It was described that its genome contained many long stretches of genes on the same strand, sometimes  
443 continuing for hundreds of kilobases [41]. The authors also note that the *de novo* assembled transcriptome  
444 appears to contain transcripts spanning multiple genes and containing multiple open reading frames, indi-  
445 cating the possibility that dinoflagellate symbionts can make cistronic transcripts. This species is not an  
446 animal, so it should not be assumed that animal modes of transcription are conserved across all eukaryotes.  
447 However, it should be noted that a recently published genome of another symbiotic dinoflagellate species *S.*  
448 *kawagutii* [40] does not display the same pattern, and instead appears to have a much greater fraction of  
449 intergenic regions than introns.

### 451 Genome composition across metazoa

452 Previous studies have discussed problems with trying to relate the number of genes to the size of the  
453 genome [91–93]. One study [18] found a weak positive correlation between genome size and number of  
454 genes. This parallels our finding that total exonic sequence is weakly correlated to total genome size (Fig 6).  
455 However, this measurement can be problematic if the genome assembly is highly fragmented, containing a  
456 large number of short contigs or scaffolds. In such cases, gene number is unlikely to correlate to genome  
457 size for the same reason as the difficulties in predicting the genic fraction, that is, it is strongly affected by  
458 gene annotation errors. In our schematic (Fig 2), a gene that is split up onto three contigs would therefore  
459 be counted as three genes, albeit short ones. If this occurs on a genome-wide scale, the count of genes will

460 be inaccurate. Parts of genes would be individually annotated as genes, increasing the total gene number  
461 without much change to the total number of exonic bases.

462  
463 Rather than relying on counts of genes or determining coding sequence, we instead examined sequence  
464 that is annotated as exons. We found that while a weak positive correlation is observed between total exonic  
465 bases and genome size, most of the difference in size is related to introns and intergenic sequence. The  
466 amount of the genome that is composed of introns is linearly related to the total genome size (Fig 6). Also  
467 considering the measured linear correlation of intergenic sequence to total size, it is not surprising that most  
468 species have roughly a 1:1 ratio of introns:intergenic sequence (Fig 9). This appears to be the case regardless  
469 of genome size or the total exonic sequence. For instance, the genome of the choanoflagellate *M. brevicollis*  
470 has 9.3Mb of introns and 10.1Mb of intergenic sequence (a ratio of 0.92) compared to 19.3Mb of exons.

471  
472 Therefore, model animals (and probably all animals) transcribe at least half of the genome, where species  
473 with smaller genomes (exon-rich) transcribe more than half (Figure 11). There does not appear to be a sig-  
474 nificant difference in the genic fraction based on animal group (Figure 10), that is, all animals appear to  
475 follow this rule. One study had shown that some larger metazoan genomes were depleted in genes [94], yet  
476 this study made use of a small number of species for comparison and included several chordates known for  
477 their very small genomes, the tunicate *C. intestinalis* and the pufferfish *T. rubripes*. The authors examined  
478 windows of 50kb and found that 80% of the human genome was lacking any gene [94], though it is unclear  
479 if this analysis was restricted to protein coding genes. However, we found that 50.2% of the human genome  
480 is composed of genes (93% of that is introns).

481  
482 While genomes of the model organisms and many non-models organisms appear to follow the hyperbolic  
483 relationship of genic fraction to size, nonetheless, a large number of the genomes in this study appear to be  
484 composed of much less than 50% genes. That observation is best explained by the hypothesis that many  
485 genomes are missing genes. These missing genes may or may not be coding, though perhaps missing gene  
486 content is made of lineage-specific proteins. Because annotation of the genome by RNAseq per se cannot  
487 distinguish coding genes from non-coding ones, we could not determine coding fractions for all species. Even  
488 for putative non-coding transcripts, some may be coding [95–97], thus protein sequencing may reveal the  
489 true nature of these transcripts.

## 491 Evolution of genomes

492 The genic fraction has a hyperbolic relationship to the total genome size. The modeled curve flattens around  
493 500Mb, after that point, introns and intergenic regions are expected to expand, on average, equally across  
494 the genome resulting in approximately 50% of the genome as genes (the majority of that being introns) and  
495 the other 50% as intergenic sequence. It should be noted that larger genomes still have more exonic bases  
496 than small genomes, though the difference in total genome size across animals is mostly from introns or  
497 intergenic sequence.

498  
499 It has been theorized that changes in genome size are a balance between short deletions and long in-  
500 sertions [98]. If the last common ancestor of all metazoans had a relatively small genome (under 100Mb,  
501 resembling some single-cell eukaryotes in our study), then the majority of modern animals have undergone  
502 dramatic expansion of their genomes, meaning dominated by insertions or duplications. How does this ex-  
503 pansion occur and does it favor a novel origin of introns or expansion of intergenic sequences? Following  
504 the trend in Fig 9 and Fig 11, it appears that small genomes are dominated by genes because they are  
505 mostly exons, and both genes and intergenic sequences are expanded in equally as the genomes enlarge.  
506 Mechanistically, these insertions are likely to be mediated by transposable elements or replication errors. As  
507 small genomes become invaded by transposable elements (perhaps following some genomic stress like genome  
508 duplication), introns appear and expand at roughly the same rate as intergenic sequences producing a 1:1  
509 ratio of intron:intergenic across all species (Fig 9).

510  
511 Above a certain size (around 500Mb), genic and intergenic sequences expand almost equally, where 50%



512 of the genome is genic; exons comprise an almost negligible fraction of the genome, which is otherwise  
513 composed of approximately equal fractions of introns and intergenic sequences. This might be explained by  
514 changes in diversity of transposable elements, as the highest diversity was found in genomes ranging from  
515 500Mb to 1.5Gb [17]. Larger genomes appeared to be flooded by transposable elements of a single type.  
516 Thus, above 500Mb, it can be predicted that select transposable elements become prevalent and multiply  
517 throughout the genome, but on average end up expanding introns and intergenic sequences equally.

518

## 519 Relationship to phenotypic complexity

520 The size of the genome can vary greatly even for closely related organisms. This has been called the “c-value  
521 paradox” [1,99], based on the observation that although the many organisms have larger genomes relative to  
522 similar species (bigger “c-value”), this measurement does not equate with more or less complex organisms in  
523 a straightforward way. A classic example of this is frog genus *Xenopus*, where the genome of the species *X.*  
524 *laevis* is almost twice as large as the species *X. tropicalis* [100], though the animal is not twice as “complex”.  
525 Similar observations have been made that the number of genes appears unrelated to the size of the genome  
526 and the complexity (sometimes called the “g-value paradox” [91,101]).

527

528 If neither genome size nor gene number are clearly related to complexity, then what is? Another relation-  
529 ship has been proposed between the usage of alternative splice variants and organismic complexity because  
530 variation in splicing can increase the number of potential proteins from an overall fixed pool of exons [102].  
531 Vertebrates and specifically mammals tend to splice transcripts more than invertebrates (meaning models  
532 fruit fly and nematode) [103,104]. One study reported a good correlation (R-squared of 0.80) of splicing to  
533 organismic complexity measured by cell types [105], but also reported that this trend effectively disappeared  
534 when correcting for sequencing depth, using the number of ESTs available as a proxy for annotation quality.  
535 The largest invertebrate genome used in that study was the deer tick *I. scapularis*, which did have a mea-  
536 sured number of cell types but unfortunately could not be analyzed further, leaving the bulk of the analysis  
537 weighted heavily by mammals and small-genome insects.

538

539 However, other studies report that alternative splicing is more frequent when the surrounding introns  
540 are long [106,107], suggesting that organisms with large genomes (and therefore larger introns) might be  
541 predisposed to splice. This could suggest that some of the invertebrates in our study may have more complex  
542 splicing patterns than are annotated in the current genome versions. For the largest invertebrate genome in  
543 our study, the octopus *O. bimaculoides*, only 14.8% of loci appeared to have alternative splice variants [45].  
544 In our reannotation we found only 6.4% of all loci have any type of splice variant. However, the majority  
545 of predicted transcripts (75%) are single exon loci, and possibly many genes are fragmented across multiple  
546 contigs (as in Figure 2). When restricted to loci with multiple exons (15% of total loci), 41% have more than  
547 one variant. These data from *O. bimaculoides* suggested that overall patterns in splicing do not display a  
548 reliable connection to organismic complexity when complexity is generalized across animal groups. However,  
549 without proper measurements of cell types from the octopus, it cannot be assumed that the number of cell  
550 types resembles the value for the fruit fly, which was implicit in other studies given that all protostomes were  
551 effectively represented by insects [105]. Thus, it could be the case that the octopus, with a large genome,  
552 has a large number of cell types and many genes are spliced, all in agreement with the splicing-complexity  
553 hypothesis.

554

555 It is a challenge to separate these observations from biases in sequencing depth (of transcripts or ESTs)  
556 and data availability. In our study, we could only make use of five invertebrates with relatively large genomes,  
557 the cnidarian *H. magnipapillata*, the pearl oyster *P. fucata*, the horseshoe crab *L. polyphemus*, the deer tick  
558 *I. scapularis*, and the octopus *O. bimaculoides*. On the other hand, NCBI has over 100 genomes of mammals  
559 available for download. Alternatively, the repertoire of splice factors or the genes that are most spliced may  
560 be of greater importance than just splicing in general. Our understanding is likely to be improved with more  
561 deeply-sequenced transcriptomes from large-genome invertebrates.

562

## 563 Limitations

564 Because we were making use of mostly public data, our analyses were subject to both technical and biological  
565 limitations. There are a small number of taxa with sequenced genomes from many invertebrate groups.  
566 Because the majority of sequenced vertebrate genomes are large and the majority of sequenced invertebrate  
567 genomes are small [92], the axis of simple invertebrate to complex vertebrate is synonymous with small to  
568 large genomes, and thus the prevalence of splicing in large-genome animals may be a consequence of the size  
569 of the genome and complexity may be only correlated. This issue is not simple to resolve, as there may not  
570 be members in all animal groups with both small and large genomes. For instance, a survey of genome sizes  
571 across Porifera stated that the largest genome out of the 70 species sampled was around 600Mb [108]. Thus,  
572 there may not be any “large” genomes in this phylum, and likewise for other invertebrate groups. Compared  
573 to birds, however, where the smallest genome identified to date is from the black-chinned hummingbird  
574 (estimated 910Mb) [109], perhaps no bird will be found that has a “small” genome.

575  
576 Our use of public genome annotations was limited in part from difficulties in defining elements. Much like  
577 definitions of transcribed pseudogenes, the identification of long-intergenic non-coding RNAs, or lincRNAs,  
578 presents a paradox of definitions. Non-coding RNAs with known functions are arguably genes, such as the  
579 X-inactivation transcript Xist, thus any functional transcribed intergenic RNA is by definition not intergenic;  
580 it is genic. This distinction rests upon discovery of a function of these putative RNAs. In the context of  
581 the ENCODE project or MouseENCODE [110], transcription was found of intergenic regions accounting  
582 for almost another 20% of the genomes of human and mouse, depending on the analysis [111, 112]. If this  
583 were all functional, then the genic fraction of the genome would be far above 50% for large genomes and  
584 the ratio of intron:intergenic sequence would not be expected to be close to 1:1. Alternatively, if most of  
585 these intergenic transcripts are non-functional “noise”, then our results are supported as presented. There-  
586 fore, consideration of the importance or genic quality rests upon the distinction between functional RNAs  
587 and noisy transcription. Existing data are not adequate to identify functions, but several experiments may  
588 improve our understanding. Conceptually, the most straightforward approach is knocking out regions of  
589 transcribed “gene deserts” in mouse or human cells, but on a larger scale than a previous study [113]. Ad-  
590 ditionally, better models of transcriptional noise or random transcription may inform whether or not the  
591 observed transcriptional patterns from the ENCODE project are consistent with noise.

## 593 Conclusion

594 We have shown that all animals transcribe at least half of their genomes in a size-dependent fashion. For large  
595 genomes, the amount of exons is almost negligible, where introns account for most of the genic sequence. In  
596 such cases, genic sequence is almost equal to the amount of intergenic sequence. Whereas for small genomes,  
597 exons can be a major fraction of the genome, resulting in the appearance of gene-dense genomes. This  
598 parity between introns and intergenic sequence is a universal feature of animal genomes, and indicates that  
599 most genomes could benefit from new annotations. Previous findings of genomic differences between animal  
600 groups are likely to result from a sampling bias, rather than biological differences. Future sequencing of more  
601 high-quality genomes from animals may reveal unanticipated sources of complexity and gene regulation with  
602 implications for the evolution of animals.

## 603 Acknowledgments

604 W.R.F would like to thank M. Eitel for helpful comments on the manuscript. This work was supported by a  
605 LMUexcellent grant (Project MODELSPONGE) to G.W. as part of the German Excellence Initiative. The  
606 authors declare no competing interests.

## 607 References

- 608 [1] Thomas CA. The Genetic Organization of Chromosomes. *Annual review of genetics*. 1971;5(1):237–  
609 256. doi:10.1146/annurev.ge.05.120171.001321.
- 610 [2] Han K, Li Zf, Peng R, Zhu Lp, Zhou T, Wang Lg, et al. Extraordinary expansion of a *Sorangium*  
611 *cellulosum* genome from an alkaline milieu. *Scientific reports*. 2013;3:2101. doi:10.1038/srep02101.
- 612 [3] Brent MR. Steady progress and recent breakthroughs in the accuracy of automated genome annotation.  
613 *Nature reviews Genetics*. 2008;9(1):62–73. doi:10.1038/nrg2220.
- 614 [4] Guigó R, Flicek P, Abril JF, Reymond A, Lagarde J, Denoeud F, et al. EGASP: the human EN-  
615 CODE Genome Annotation Assessment Project. *Genome biology*. 2006;7 Suppl 1(Suppl 1):S2.1–31.  
616 doi:10.1186/gb-2006-7-s1-s2.
- 617 [5] Vallender EJ. Bioinformatic approaches to identifying orthologs and assessing evolutionary relation-  
618 ships. *Methods*. 2009;49(1):50–55. doi:10.1016/j.ymeth.2009.05.010.
- 619 [6] Zhang X, Goodsell J, Norgren RB. Limitations of the rhesus macaque draft genome assembly and  
620 annotation. *BMC genomics*. 2012;13(1):206. doi:10.1186/1471-2164-13-206.
- 621 [7] Altenhoff AM, Boeckmann B, Capella-Gutierrez S, Dalquen DA, DeLuca T, Forslund K, et al.  
622 Standardized benchmarking in the quest for orthologs. *Nature Methods*. 2016;13(5):425–430.  
623 doi:10.1038/nmeth.3830.
- 624 [8] Ryan JF, Pang K, Schnitzler CE, a D Nguyen Ad, Moreland RT, Simmons DK, et al. The  
625 Genome of the Ctenophore *Mnemiopsis leidyi* and Its Implications for Cell Type Evolution. *Science*.  
626 2013;342(6164):1242592–1242592. doi:10.1126/science.1242592.
- 627 [9] Pisani D, Pett W, Dohrmann M, Feuda R, Rota-Stabelli O, Philippe H, et al. Genomic data do not  
628 support comb jellies as the sister group to all other animals. *Proceedings of the National Academy of*  
629 *Sciences*. 2015;112(50):201518127. doi:10.1073/pnas.1518127112.
- 630 [10] Parra G, Bradnam K, Korf I. CEGMA: a pipeline to accurately annotate core genes in eukaryotic  
631 genomes. *Bioinformatics (Oxford, England)*. 2007;23(9):1061–7. doi:10.1093/bioinformatics/btm071.
- 632 [11] Simão FA, Waterhouse RM, Ioannidis P, Kriventseva EV. BUSCO : assessing genome assem-  
633 bly and annotation completeness with single-copy orthologs. *Genome analysis*. 2015;31(June):9–10.  
634 doi:10.1093/bioinformatics/btv351.
- 635 [12] Lynch M, Conery JS. The origins of genome complexity. *Science (New York, NY)*. 2003;302(5649):1401–  
636 4. doi:10.1126/science.1089370.
- 637 [13] Lynch M. Response to Comment on "The Origins of Genome Complexity". *Science*.  
638 2004;306(5698):978b–978b. doi:10.1126/science.1100559.
- 639 [14] Daubin V, Moran Na. Comment on "The origins of genome complexity". *Science (New York, NY)*.  
640 2004;306(5698):978; author reply 978. doi:10.1126/science.1098469.
- 641 [15] Pettersson ME, Kurland CG, Berg OG. Deletion rate evolution and its effect on genome size and  
642 coding density. *Molecular Biology and Evolution*. 2009;26(6):1421–1430. doi:10.1093/molbev/msp054.
- 643 [16] Kidwell MG. Transposable elements and the evolution of genome size in eukaryotes. *Genetica*.  
644 2002;115(1):49–63. doi:10.1023/A:1016072014259.
- 645 [17] Elliott TA, Gregory TR. Do larger genomes contain more diverse transposable elements? *BMC*  
646 *evolutionary biology*. 2015;15(1):69. doi:10.1186/s12862-015-0339-8.
- 647 [18] Elliott TA, Gregory TR. What's in a genome? The C-value enigma and the evolution of eukaryotic  
648 genome content. *Phil Trans R Soc B*. 2015;370(1678):20140331. doi:10.1098/rstb.2014.0331.

- 649 [19] Canapa A, Barucca M, Biscotti MA, Forconi M, Olmo E. Transposons, Genome Size, and Evolutionary  
650 Insights in Animals. *Cytogenetic and Genome Research*. 2016; p. 217–239. doi:10.1159/000444429.
- 651 [20] Deutsch M, Long M. Intron-exon structures of eukaryotic model organisms. *Nucleic acids research*.  
652 1999;27(15):3219–28.
- 653 [21] Zhu L, Zhang Y, Zhang W, Yang S, Chen JQ, Tian D. Patterns of exon-intron architecture variation  
654 of genes in eukaryotic genomes. *BMC genomics*. 2009;10(1):47. doi:10.1186/1471-2164-10-47.
- 655 [22] Dehal P, Satou Y, Campbell RK, Chapman J, Degnan B, De Tomaso A, et al. The draft genome  
656 of *Ciona intestinalis*: insights into chordate and vertebrate origins. *Science (New York, NY)*.  
657 2002;298(5601):2157–2167. doi:10.1126/science.1080049.
- 658 [23] Putnam NH, Butts T, Ferrier DEK, Furlong RF, Hellsten U, Kawashima T, et al. The am-  
659 phioxus genome and the evolution of the chordate karyotype. *Nature*. 2008;453(7198):1064–71.  
660 doi:10.1038/nature06967.
- 661 [24] Srivastava M, Begovic E, Chapman J, Putnam NH, Hellsten U, Kawashima T, et al. The Trichoplax  
662 genome and the nature of placozoans. *Nature*. 2008;454(7207):955–60. doi:10.1038/nature07191.
- 663 [25] Simakov O, Marletaz F, Cho SJ, Edsinger-Gonzales E, Havlak P, Hellsten U, et al. Insights into bilate-  
664 rian evolution from three spiralian genomes. *Nature*. 2013;493(7433):526–31. doi:10.1038/nature11696.
- 665 [26] Simakov O, Kawashima T, Marlétaz F, Jenkins J, Koyanagi R, Mitros T, et al. Hemichordate genomes  
666 and deuterostome origins. *Nature*. 2015; p. 1–19. doi:10.1038/nature16150.
- 667 [27] King N, Westbrook MJ, Young SL, Kuo A, Abedin M, Chapman J, et al. The genome of the  
668 choanoflagellate *Monosiga brevicollis* and the origin of metazoans. *Nature*. 2008;451(7180):783–8.  
669 doi:10.1038/nature06617.
- 670 [28] Read Ba, Kegel J, Klute MJ, Kuo A, Lefebvre SC, Maumus F, et al. Pan genome of the phytoplankton  
671 *Emiliania underpins* its global distribution. *Nature*. 2013; p. 9–13. doi:10.1038/nature12221.
- 672 [29] Prochnik SE, Umen J, Nedelcu AM, Hallmann A, Miller SM, Nishii I, et al. Genomic analysis  
673 of organismal complexity in the multicellular green alga *Volvox carteri*. *Science (New York, NY)*.  
674 2010;329(5988):223–6. doi:10.1126/science.1188800.
- 675 [30] Suga H, Chen Z, de Mendoza A, Sebé-Pedrós A, Brown MW, Kramer E, et al. The *Capsaspora*  
676 genome reveals a complex unicellular prehistory of animals. *Nature communications*. 2013;4:2325.  
677 doi:10.1038/ncomms3325.
- 678 [31] Fairclough SR, Chen Z, Kramer E, Zeng Q, Young S, Robertson HM, et al. Premetazoan genome  
679 evolution and the regulation of cell differentiation in the choanoflagellate *Salpingoeca rosetta*. *Genome*  
680 *biology*. 2013;14(2):R15. doi:10.1186/gb-2013-14-2-r15.
- 681 [32] Fernandez-Valverde SL, Calcino AD, Degnan BM. Deep developmental transcriptome sequencing  
682 uncovers numerous new genes and enhances gene annotation in the sponge *Amphimedon queenslandica*.  
683 *BMC Genomics*. 2015;16(1):1–11. doi:10.1186/s12864-015-1588-z.
- 684 [33] Srivastava M, Simakov O, Chapman J, Fahey B, Gauthier MEa, Mitros T, et al. The *Amphime-*  
685 *don queenslandica* genome and the evolution of animal complexity. *Nature*. 2010;466(7307):720–6.  
686 doi:10.1038/nature09201.
- 687 [34] Putnam NH, Srivastava M, Hellsten U, Dirks B, Chapman J, Salamov A, et al. Sea anemone genome  
688 reveals ancestral eumetazoan gene repertoire and genomic organization. *Science (New York, NY)*.  
689 2007;317(5834):86–94. doi:10.1126/science.1139158.
- 690 [35] Moran Y, Fredman D, Praher D, Li XZ, Wee LM, Rentzsch F, et al. Cnidarian microRNAs frequently  
691 regulate targets by cleavage. *Genome Research*. 2014;24(4):651–663. doi:10.1101/gr.162503.113.

- 692 [36] Fortunato SaV, Adamski M, Ramos OM, Leininger S, Liu J, Ferrier DEK, et al. Calcisponges have a  
693 ParaHox gene and dynamic expression of dispersed NK homeobox genes. *Nature*. 2014;514(7524):620–  
694 623. doi:10.1038/nature13881.
- 695 [37] Voskoboynik A, Neff NF, Sahoo D, Newman AM, Pushkarev D, Koh W, et al. The genome sequence  
696 of the colonial chordate, *Botryllus schlosseri*. *eLife*. 2013;2:e00569. doi:10.7554/eLife.00569.
- 697 [38] Baumgarten S, Simakov O, Esherick LY, Liew YJ, Lehnert EM, Michell CT, et al. The genome of  
698 *Aiptasia*, a sea anemone model for coral symbiosis. *Proceedings of the National Academy of Sciences*.  
699 2015; p. 201513318. doi:10.1073/pnas.1513318112.
- 700 [39] Deroeud F, Henriot S, Mungpakdee S, Aury JM, Da Silva C, Brinkmann H, et al. Plasticity of Animal  
701 Genome Architecture Unmasked by Rapid Evolution of a Pelagic Tunicate. *Science*. 2010;1381(2010).  
702 doi:10.1126/science.1194167.
- 703 [40] Lin S, Cheng S, Song B, Zhong X, Lin X, Li W, et al. The *Symbiodinium kawagutii* genome  
704 illuminates dinoflagellate gene expression and coral symbiosis. *Science*. 2015;350(6261):691–694.  
705 doi:10.1126/science.aad0408.
- 706 [41] Shoguchi E, Shinzato C, Kawashima T, Gyoja F, Mungpakdee S, Koyanagi R, et al. Draft Assembly of  
707 the *Symbiodinium minutum* Nuclear Genome Reveals Dinoflagellate Gene Structure. *Current biology*  
708 : CB. 2013;23:1399–1408. doi:10.1016/j.cub.2013.05.062.
- 709 [42] Takeuchi T, Kawashima T, Koyanagi R, Gyoja F, Tanaka M, Ikuta T, et al. Draft genome of  
710 the pearl oyster *Pinctada fucata*: a platform for understanding bivalve biology. *DNA research* :  
711 an international journal for rapid publication of reports on genes and genomes. 2012;19(2):117–30.  
712 doi:10.1093/dnares/dss005.
- 713 [43] Shinzato C, Shoguchi E, Kawashima T, Hamada M, Hisata K, Tanaka M, et al. Using the *Acropora*  
714 *digitifera* genome to understand coral responses to environmental change. *Nature*. 2011;476(7360):320–  
715 3. doi:10.1038/nature10249.
- 716 [44] Luo YJ, Takeuchi T, Koyanagi R, Yamada L, Kanda M, Khalturina M, et al. The *Lingula* genome  
717 provides insights into brachiopod evolution and the origin of phosphate biomineralization. *Nature*  
718 *Communications*. 2015;6:1–10. doi:10.1038/ncomms9301.
- 719 [45] Albertin CB, Simakov O, Mitros T, Wang ZY, Pungor JR, Edsinger-gonzales E, et al. The  
720 octopus genome and the evolution of cephalopod neural and morphological novelties. *Nature*.  
721 2015;doi:10.1038/nature14668.
- 722 [46] Kirkness EF. The Dog Genome: Survey Sequencing and Comparative Analysis. *Science*.  
723 2003;301(5641):1898–1903. doi:10.1126/science.1086432.
- 724 [47] Mikkelsen TS, Wakefield MJ, Aken B, Amemiya CT, Chang JL, Duke S, et al. Genome of the marsupial  
725 *Monodelphis domestica* reveals innovation in non-coding sequences. *Nature*. 2007;447(7141):167–77.  
726 doi:10.1038/nature05805.
- 727 [48] Warren WC, Hillier LW, Marshall Graves JA, Birney E, Ponting CP, Grützner F, et al. Genome  
728 analysis of the platypus reveals unique signatures of evolution. *Nature*. 2008;453(7192):175–183.  
729 doi:10.1038/nature06936.
- 730 [49] Hellsten U, Harland RM, Gilchrist MJ, Hendrix D, Jurka J, Kapitonov V, et al. The genome  
731 of the Western clawed frog *Xenopus tropicalis*. *Science (New York, NY)*. 2010;328(5978):633–6.  
732 doi:10.1126/science.1183670.
- 733 [50] Zhang G, Li C, Li Q, Li B, Larkin DM, Lee C, et al. Comparative genomics reveals insights into avian  
734 genome evolution and adaptation. *Science*. 2014;346(6215):1311–1320. doi:10.1126/science.1251385.
- 735 [51] Warren WC, Clayton DF, Ellegren H, Arnold AP, Hillier LW, Künstner A, et al. The genome of a  
736 songbird. *Nature*. 2010;464(7289):757–62. doi:10.1038/nature08819.



- 737 [52] Huang Y, Li Y, Burt DW, Chen H, Zhang Y, Qian W, et al. The duck genome and transcriptome  
738 provide insight into an avian influenza virus reservoir species. *Nature genetics*. 2013;45(7):776–83.  
739 doi:10.1038/ng.2657.
- 740 [53] Ganapathy G, Howard JT, Ward JM, Li J, Li B, Li Y, et al. High-coverage sequencing and annotated  
741 assemblies of the budgerigar genome. *GigaScience*. 2014;3:11. doi:10.1186/2047-217X-3-11.
- 742 [54] Green RE, Braun EL, Armstrong J, Earl D, Nguyen N, Hickey G, et al. Three crocodylian genomes  
743 reveal ancestral patterns of evolution among archosaurs. *Science*. 2014;346(6215):1254449–1254449.  
744 doi:10.1126/science.1254449.
- 745 [55] Alföldi J, Di Palma F, Grabherr M, Williams C, Kong L, Mauceli E, et al. The genome of the green  
746 anole lizard and a comparative analysis with birds and mammals. *Nature*. 2011;477(7366):587–91.  
747 doi:10.1038/nature10390.
- 748 [56] Shaffer HB, Minx P, Warren DE, Shedlock AM, Thomson RC, Valenzuela N, et al. The western  
749 painted turtle genome, a model for the evolution of extreme physiological adaptations in a slowly  
750 evolving lineage. *Genome biology*. 2013;14(3):R28. doi:10.1186/gb-2013-14-3-r28.
- 751 [57] Wang Z, Pascual-Anaya J, Zadissa A, Li W, Niimura Y, Huang Z, et al. The draft genomes of soft-shell  
752 turtle and green sea turtle yield insights into the development and evolution of the turtle-specific body  
753 plan. *Nature Genetics*. 2013;45(6):701–706. doi:10.1038/ng.2615.
- 754 [58] Koning APJD, Hall KT, Card DC, Drew R, Fujita MK, Ruggiero RP, et al. The Burmese python  
755 genome reveals the molecular basis for extreme adaptation in snakes. *Proceedings of the National  
756 Academy of Sciences*. 2013;110(51):20645–20650. doi:10.1073/pnas.1324475110.
- 757 [59] Howe K, Clark MD, Torroja CF, Torrance J, Berthelot C, Muffato M, et al. The zebrafish refer-  
758 ence genome sequence and its relationship to the human genome. *Nature*. 2013;496(7446):498–503.  
759 doi:10.1038/nature12111.
- 760 [60] Amemiya CT, Alföldi J, Lee AP, Fan S, Philippe H, MacCallum I, et al. The African coelacanth genome  
761 provides insights into tetrapod evolution. *Nature*. 2013;496(7445):311–316. doi:10.1038/nature12027.
- 762 [61] Smith JJ, Kuraku S, Holt C, Sauka-Spengler T, Jiang N, Campbell MS, et al. Sequencing of the sea  
763 lamprey (*Petromyzon marinus*) genome provides insights into vertebrate evolution. *Nature genetics*.  
764 2013;45(4):415–21, 421e1–2. doi:10.1038/ng.2568.
- 765 [62] Venkatesh B, Lee AP, Ravi V, Maurya AK, Lian MM, Swann JB, et al. Elephant shark genome provides  
766 unique insights into gnathostome evolution. *Nature*. 2014;505(7482):174–179. doi:10.1038/nature12826.
- 767 [63] Zhang GG, Fang X, Guo X, Li L, Luo R, Xu F, et al. The oyster genome reveals stress adaptation  
768 and complexity of shell formation. *Nature*. 2012;490(7418):49–54. doi:10.1038/nature11413.
- 769 [64] Keeling CI, Yuen MM, Liao NY, Roderick Docking T, Chan SK, Taylor Ga, et al. Draft genome of  
770 the mountain pine beetle, *Dendroctonus ponderosae* Hopkins, a major forest pest. *Genome biology*.  
771 2013;14(3):R27. doi:10.1186/gb-2013-14-3-r27.
- 772 [65] Richards S, Gibbs Ra, Weinstock GM, Brown SJ, Denell RE, Beeman RW, et al. The genome of the  
773 model beetle and pest *Tribolium castaneum*. *Nature*. 2008;452(7190):949–55. doi:10.1038/nature06784.
- 774 [66] Mita K, Kasahara M, Sasaki S, Nagayasu Y, Yamada T, Kanamori H, et al. The genome sequence of  
775 silkworm, *Bombyx mori*. *DNA research*. 2004;11:27–35.
- 776 [67] Nossa CW, Havlak P, Yue JX, Lv J, Vincent KY, Brockmann HJ, et al. Joint assembly and genetic  
777 mapping of the Atlantic horseshoe crab genome reveals ancient whole genome duplication. *GigaScience*.  
778 2014;3:9. doi:10.1186/2047-217X-3-9.
- 779 [68] The *C. elegans* Sequencing Consortium. Genome Sequence of the Nematode *C. elegans*: A Platform  
780 for Investigating Biology. *Science*. 1998;282(5396):2012–2018. doi:10.1126/science.282.5396.2012.



- 781 [69] Sodergren E, Weinstock GM, Davidson EH, Cameron RA, Gibbs RA, Angerer RC, et al. The genome  
782 of the sea urchin *Strongylocentrotus purpuratus*. *Science (New York, NY)*. 2006;314(5801):941–52.  
783 doi:10.1126/science.1133609.
- 784 [70] Colbourne JK, Pfrender ME, Gilbert D, Thomas WK, Tucker A, Oakley TH, et al. The  
785 ecoresponsive genome of *Daphnia pulex*. *Science (New York, NY)*. 2011;331(6017):555–61.  
786 doi:10.1126/science.1197761.
- 787 [71] Weinstock GM, Robinson GE, Gibbs Ra, Worley KC, Evans JD, Maleszka R, et al. Insights into  
788 social insects from the genome of the honeybee *Apis mellifera*. *Nature*. 2006;443(7114):931–949.  
789 doi:10.1038/nature05260.
- 790 [72] Gulia-Nuss M, Nuss AB, Meyer JM, Sonenshine DE, Roe RM, Waterhouse RM, et al. Genomic  
791 insights into the *Ixodes scapularis* tick vector of Lyme disease. *Nature Communications*. 2016;7(May  
792 2015):10507. doi:10.1038/ncomms10507.
- 793 [73] Chipman AD, Ferrier DEK, Brena C, Qu J, Hughes DST, Schröder R, et al. The First Myriapod  
794 Genome Sequence Reveals Conservative Arthropod Gene Content and Genome Organisation in the  
795 Centipede *Strigamia maritima*. *PLoS Biology*. 2014;12(11). doi:10.1371/journal.pbio.1002005.
- 796 [74] Stanke M, Diekhans M, Baertsch R, Haussler D. Using native and syntenically mapped  
797 cDNA alignments to improve de novo gene finding. *Bioinformatics*. 2008;24(5):637–644.  
798 doi:10.1093/bioinformatics/btn013.
- 799 [75] Hoff KJ, Stanke M. WebAUGUSTUS—a web service for training AUGUSTUS and predicting genes in  
800 eukaryotes. *Nucleic Acids Research*. 2013;41(W1):W123–W128. doi:10.1093/nar/gkt418.
- 801 [76] Chapman Ja, Kirkness EF, Simakov O, Hampson SE, Mitros T, Weinmaier T, et al. The dynamic  
802 genome of *Hydra*. *Nature*. 2010;464(7288):592–6. doi:10.1038/nature08830.
- 803 [77] Kim D, Pertea G, Trapnell C, Pimentel H, Kelley R, Salzberg SL. TopHat2: accurate alignment of tran-  
804 scriptomes in the presence of insertions, deletions and gene fusions. *Genome biology*. 2013;14(4):R36.  
805 doi:10.1186/gb-2013-14-4-r36.
- 806 [78] Pertea M, Pertea GM, Antonescu CM, Chang TC, Mendell JT, Salzberg SL. StringTie enables im-  
807 proved reconstruction of a transcriptome from RNA-seq reads. *Nature Biotechnology*. 2015;33(3).  
808 doi:10.1038/nbt.3122.
- 809 [79] Preußner C, Jaé N, Bindereif A. mRNA splicing in trypanosomes. *International Journal of Medical*  
810 *Microbiology*. 2012;302(4-5):221–224. doi:10.1016/j.ijmm.2012.07.004.
- 811 [80] Siegel TN, Hekstra DR, Wang X, Dewell S, Cross GAM. Genome-wide analysis of mRNA abundance  
812 in two life-cycle stages of *Trypanosoma brucei* and identification of splicing and polyadenylation sites.  
813 *Nucleic Acids Research*. 2010;38(15):4946–4957. doi:10.1093/nar/gkq237.
- 814 [81] Hardie DC, Hebert PD. Genome-size evolution in fishes. *Canadian Journal of Fisheries and Aquatic*  
815 *Sciences*. 2004;61(9):1636–1646. doi:10.1139/f04-106.
- 816 [82] Treangen TJ, Salzberg SL. Repetitive DNA and next-generation sequencing: Computational challenges  
817 and solutions. *Nature Reviews Genetics*. 2012;13(1):36–46. doi:10.1038/nrg3117.
- 818 [83] Kajitani R, Toshimoto K, Noguchi H, Toyoda A, Ogura Y, Okuno M, et al. Efficient de novo as-  
819 sembly of highly heterozygous genomes from whole-genome shotgun short reads. *Genome Research*.  
820 2014;24(8):1384–1395. doi:10.1101/gr.170720.113.
- 821 [84] Bankevich A, Nurk S, Antipov D, Gurevich Aa, Dvorkin M, Kulikov AS, et al. SPAdes: A New Genome  
822 Assembly Algorithm and Its Applications to Single-Cell Sequencing. *Journal of Computational Biology*.  
823 2012;19(5):455–477. doi:10.1089/cmb.2012.0021.

- 824 [85] Tilgner H, Nikolaou C, Althammer S, Sammeth M, Beato M, Valcárcel J, et al. Nucleosome positioning  
825 as a determinant of exon recognition. *Nature structural & molecular biology*. 2009;16(9):996–1001.  
826 doi:10.1038/nsmb.1658.
- 827 [86] Sakharkar MK, Chow VTK, Kanguene P. Distributions of exons and introns in the human genome.  
828 *In silico biology*. 2004;4(4):387–93.
- 829 [87] Bellis ES, Howe DK, Denver DR. Genome-wide polymorphism and signatures of selection in the  
830 symbiotic sea anemone *Aiptasia*. *BMC Genomics*. 2016;17:160. doi:10.1186/s12864-016-2488-6.
- 831 [88] Leffler EM, Bullaughey K, Matute DR, Meyer WK, S?gurel L, Venkat A, et al. Revisiting an  
832 Old Riddle: What Determines Genetic Diversity Levels within Species? *PLoS Biology*. 2012;10(9).  
833 doi:10.1371/journal.pbio.1001388.
- 834 [89] Bányai L, Patthy L. Putative extremely high rate of proteome innovation in lancelets might  
835 be explained by high rate of gene prediction errors. *Scientific Reports*. 2016;6(April):30700.  
836 doi:10.1038/srep30700.
- 837 [90] Zmasek CM, Godzik A. This Déjà Vu Feeling-Analysis of Multidomain Protein Evolution in Eukaryotic  
838 Genomes. *PLoS Computational Biology*. 2012;8(11). doi:10.1371/journal.pcbi.1002701.
- 839 [91] Hahn MW, Wray GA. The g-value paradox. *Evolution and Development*. 2002;4(2):73–75.  
840 doi:10.1046/j.1525-142X.2002.01069.x.
- 841 [92] Gregory TR. Synergy between sequence and size in large-scale genomics. *Nature reviews Genetics*.  
842 2005;6(9):699–708. doi:10.1038/nrg1674.
- 843 [93] Denton JF, Lugo-Martinez J, Tucker AE, Schrider DR, Warren WC, Hahn MW. Extensive Error in the  
844 Number of Genes Inferred from Draft Genome Assemblies. *PLoS Computational Biology*. 2014;10(12).  
845 doi:10.1371/journal.pcbi.1003998.
- 846 [94] Fernandez-Valverde SL, Degnan BM. Bilaterian-like promoters in the highly compact *Amphimedon*  
847 *queenslandica* genome. *Scientific Reports*. 2016;6(February):22496. doi:10.1038/srep22496.
- 848 [95] Wilson BA, Masel J. Putatively noncoding transcripts show extensive association with ribosomes.  
849 *Genome biology and evolution*. 2011;3:1245–52. doi:10.1093/gbe/evr099.
- 850 [96] Slavoff Sa, Mitchell AJ, Schwaid AG, Cabili MN, Ma J, Levin JZ, et al. Peptidomic discovery of  
851 short open reading frame-encoded peptides in human cells. *Nature chemical biology*. 2012;9(1):59–64.  
852 doi:10.1038/nchembio.1120.
- 853 [97] Guttman M, Russell P, Ingolia NT, Weissman JS, Lander ES. Ribosome profiling pro-  
854 vides evidence that large noncoding RNAs do not encode proteins. *Cell*. 2013;154(1):240–251.  
855 doi:10.1016/j.cell.2013.06.009.
- 856 [98] Petrov D. Mutational Equilibrium Model of Genome Size Evolution. *Theoretical Population Biology*.  
857 2002;61(4):531–544. doi:10.1006/tpbi.2002.1605.
- 858 [99] Moore G. The C-Value Paradox. *BioScience*. 1984;34(7):425–429. doi:10.2307/1309631.
- 859 [100] Thiébaud CH, Fischberg M. DNA content in the genus *Xenopus*. *Chromosoma*. 1977;59(3):253–7.
- 860 [101] Schad E, Tompa P, Hegyi H. The relationship between proteome size, structural disorder and organism  
861 complexity. *Genome biology*. 2011;12(12):R120. doi:10.1186/gb-2011-12-12-r120.
- 862 [102] Nilsen TW, Graveley BR. Expansion of the eukaryotic proteome by alternative splicing. *Nature*.  
863 2010;463(January). doi:10.1038/nature08909.
- 864 [103] Brett D, Pospisil H, Valcárcel J, Reich J, Bork P. Alternative splicing and genome complexity. *Nature*  
865 *genetics*. 2002;30(1):29–30. doi:10.1038/ng803.

- 866 [104] Kim H, Klein R, Majewski J, Ott J. Estimating rates of alternative splicing in mammals and invertebrates. *Nature genetics*. 2004;36(9):915–6; author reply 916–7. doi:10.1038/ng0904-915.  
867
- 868 [105] Chen L, Bush SJ, Tovar-Corona JM, Castillo-Morales A, Urrutia AO. Correcting for differential transcript coverage reveals a strong relationship between alternative splicing and organism complexity. *Molecular biology and evolution*. 2014;31(6):1402–13. doi:10.1093/molbev/msu083.  
869  
870
- 871 [106] Kim E, Magen A, Ast G. Different levels of alternative splicing among eukaryotes. *Nucleic Acids Research*. 2007;35(1):125–131. doi:10.1093/nar/gkl924.  
872
- 873 [107] Pickrell JK, Pai AA, Gilad Y, Pritchard JK. Noisy splicing drives mRNA isoform diversity in human cells. *PLoS Genetics*. 2010;6(12):1–11. doi:10.1371/journal.pgen.1001236.  
874
- 875 [108] Jeffery NW, Jardine CB, Gregory TR. A first exploration of genome size diversity in sponges. *Genome*. 2013;56(8):451–6. doi:10.1139/gen-2012-0122.  
876
- 877 [109] Gregory TR, Andrews CB, McGuire JA, Witt CC. The smallest avian genomes are found in hummingbirds. *Proceedings Biological sciences / The Royal Society*. 2009;276(1674):3753–3757. doi:10.1098/rspb.2009.1004.  
878  
879
- 880 [110] Consortium ME. A comparative encyclopedia of DNA elements in the mouse genome. *Nature*. 2014;515(7527):355–364. doi:10.1038/nature13992.  
881
- 882 [111] van Bakel H, Nislow C, Blencowe BJ, Hughes TR. Most "dark matter" transcripts are associated with known genes. *PLoS Biology*. 2010;8(5). doi:10.1371/journal.pbio.1000371.  
883
- 884 [112] Clark MB, Amaral PP, Schlesinger FJ, Dinger ME, Taft RJ, Rinn JL, et al. The reality of pervasive transcription. *PLoS Biology*. 2011;9(7):5–10. doi:10.1371/journal.pbio.1000625.  
885
- 886 [113] Nóbrega MA, Zhu Y, Plajzer-Frick I, Afzal V, Rubin EM. Megabase deletions of gene deserts result in viable mice. *Nature*. 2004;431(7011):988–93. doi:10.1038/nature03022.  
887
